# Supplementary material
Source: PubMed Central journal article supplement (PMC11104979)
Supplement: 18_2019_3414_MOESM1_ESM.pdf [file 18_2019_3414_MOESM1_ESM.pdf]

# Supplementary Materials

## The Dark Side of Alzheimer's Disease: Unstructured Biology of Proteins from the Amyloid Cascade Signaling Pathway

Kundlik Gadhave<sup>1</sup>, Bhuvaneshwari R. Gehi<sup>1</sup>, Prateek Kumar<sup>1</sup>, Bin Xue<sup>2</sup>, Vladimir N. Uversky<sup>2,3,\*</sup>, and Rajanish Giri<sup>1\*</sup>

### Affiliations

1. School of Basic Sciences, Indian Institute of Technology Mandi, Mandi, India
2. Department of Cell Biology, Microbiology and Molecular Biology, School of Natural Sciences and Mathematics, College of Arts and Sciences, University of South Florida, Tampa, FL, 33620, USA
3. Department of Molecular Medicine and Byrd Alzheimer's Research Institute, Morsani College of Medicine, University of South Florida, Tampa, FL, 33612, USA
4. Laboratory of New Methods in Biology, Institute for Biological Instrumentation, Russian Academy of Sciences, 142290 Pushchino, Moscow Region, Russia

\*correspondence to: [yuversky@health.usf.edu](mailto:yuversky@health.usf.edu) or [rajanishgiri@iitmandi.ac.in](mailto:rajanishgiri@iitmandi.ac.in)







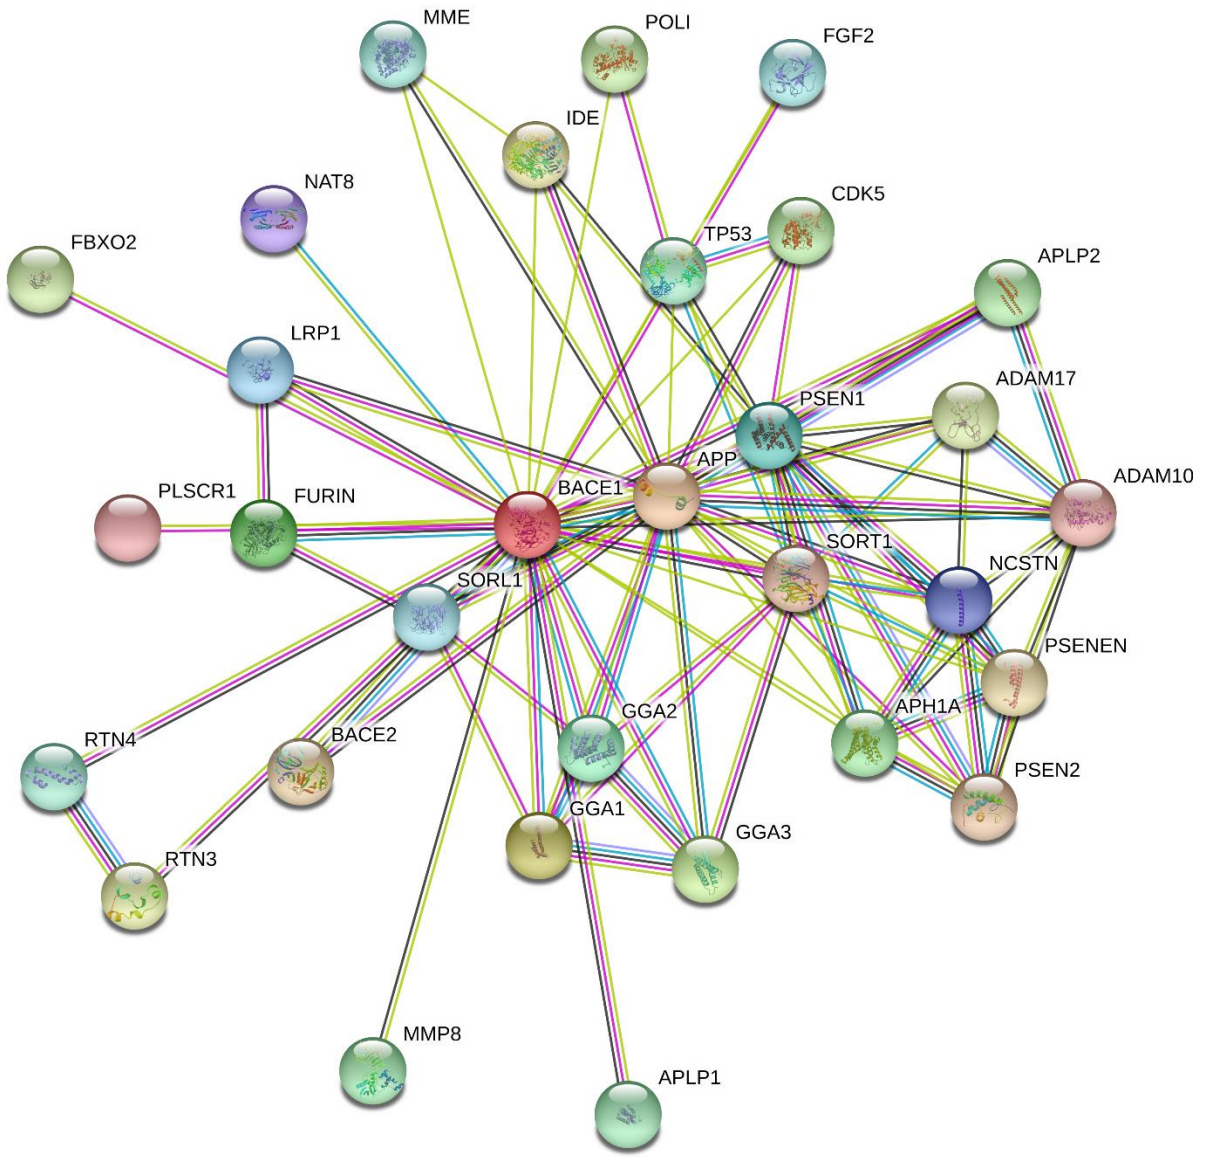

**Figure S1C**



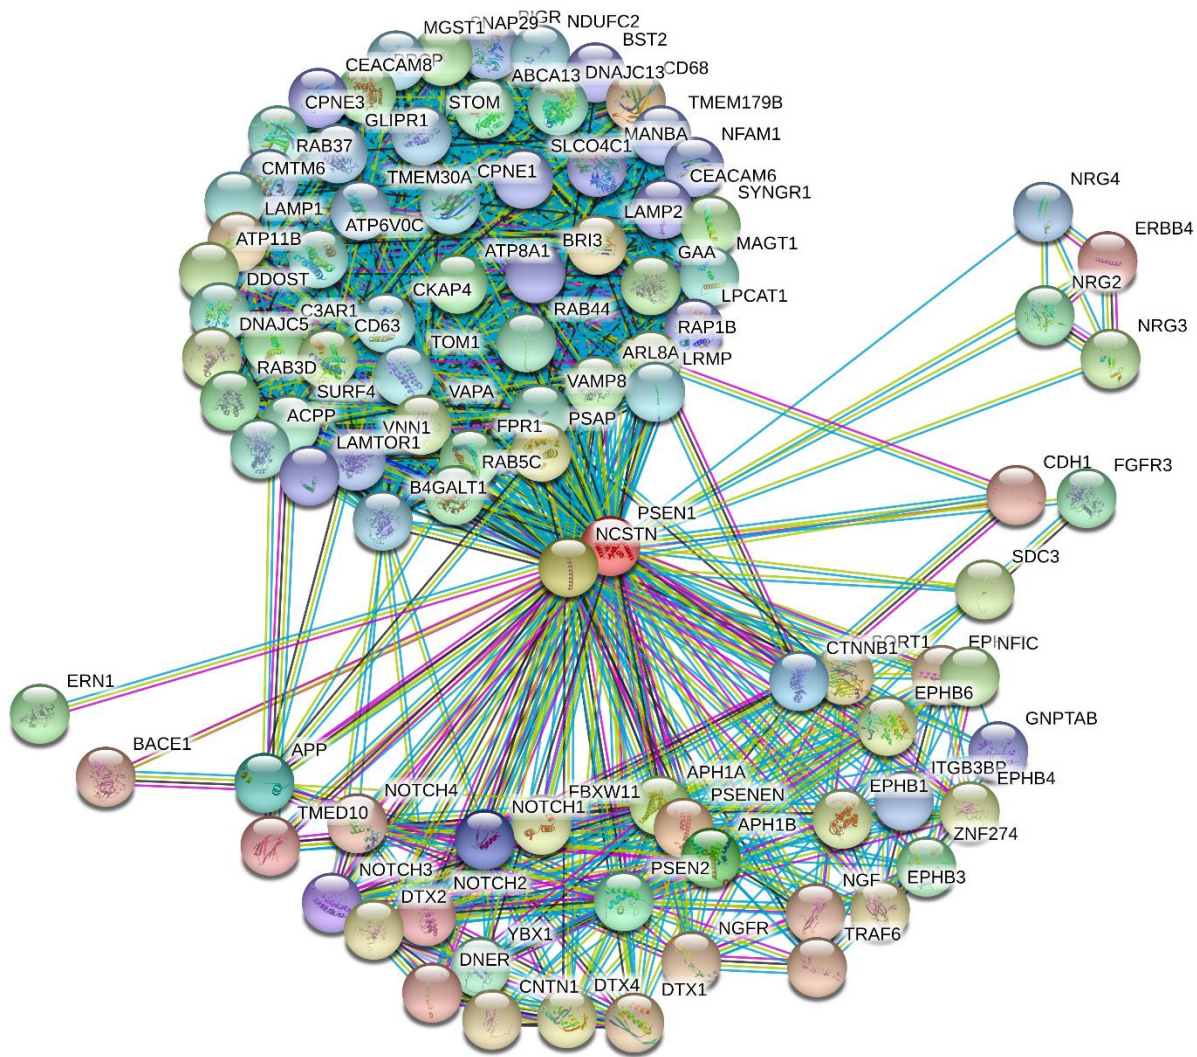

**Figure S1D**

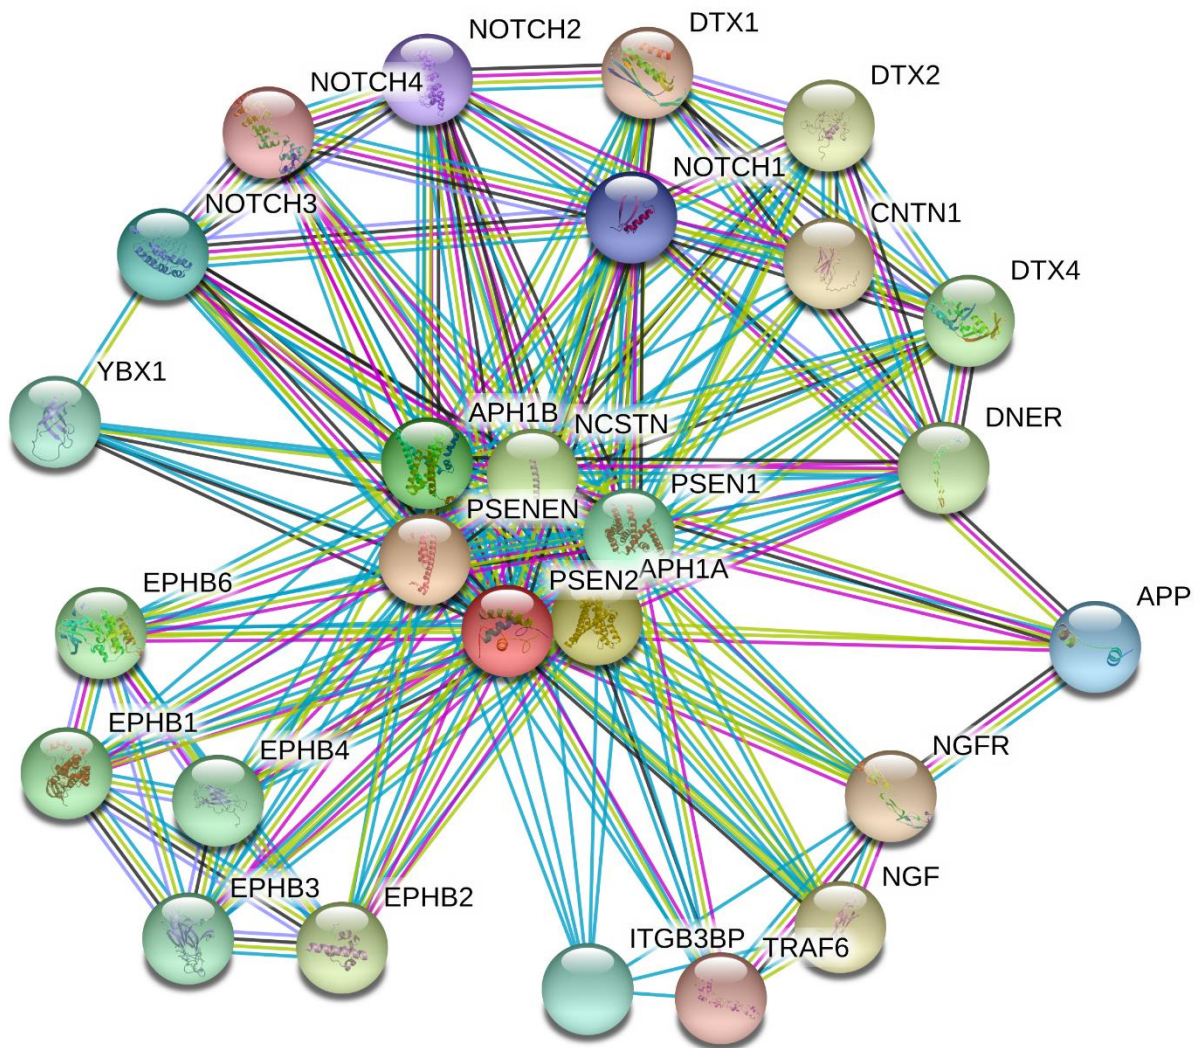

**Figure S1E**



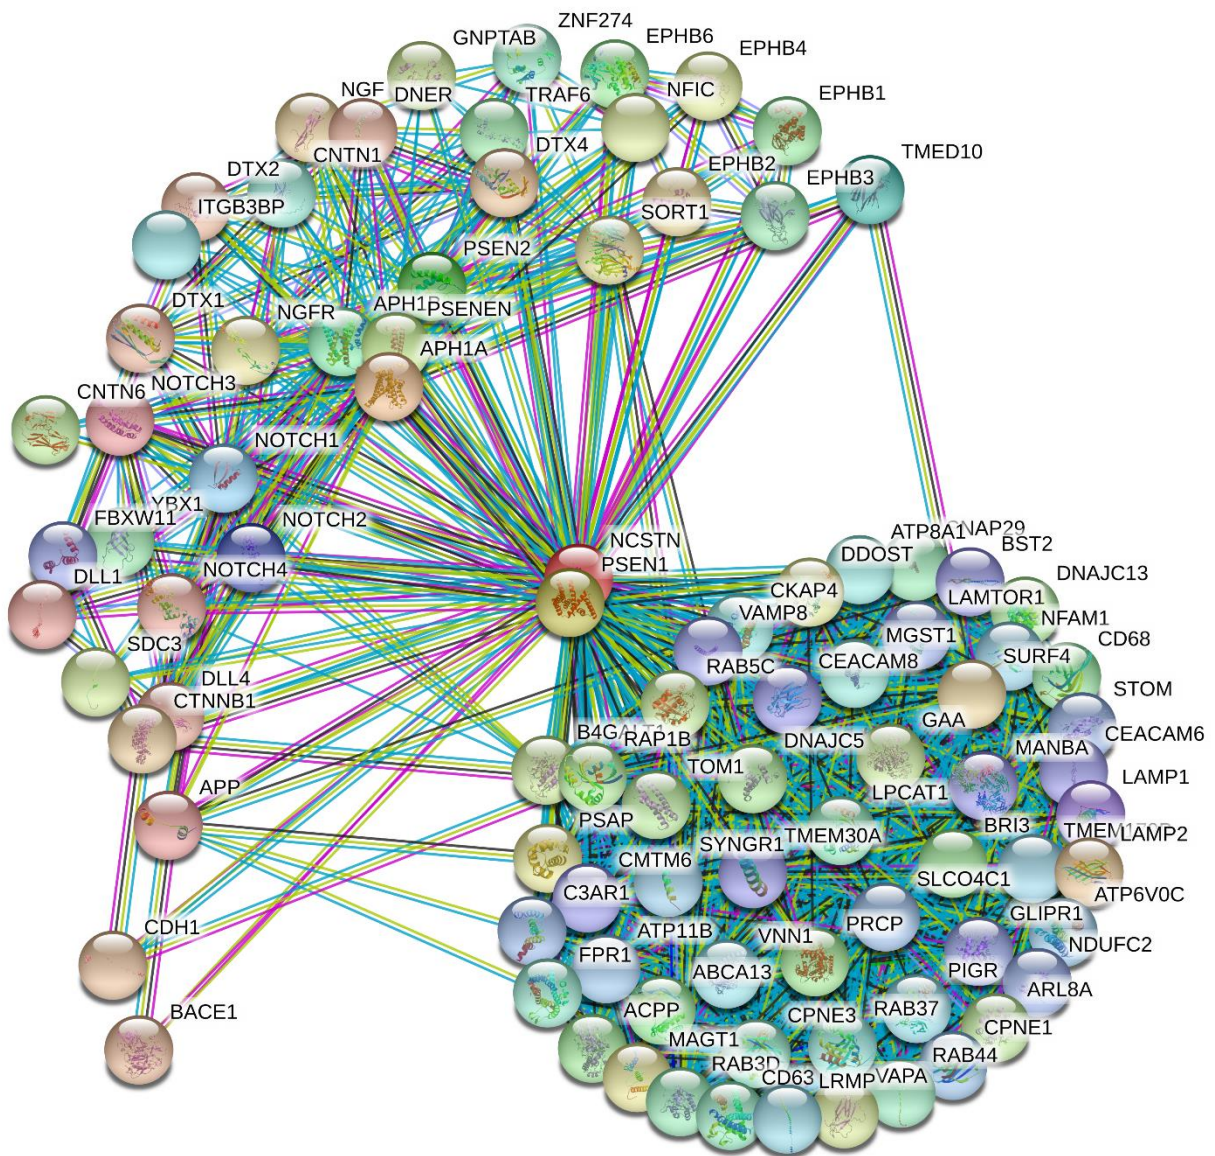

**Figure S1F**



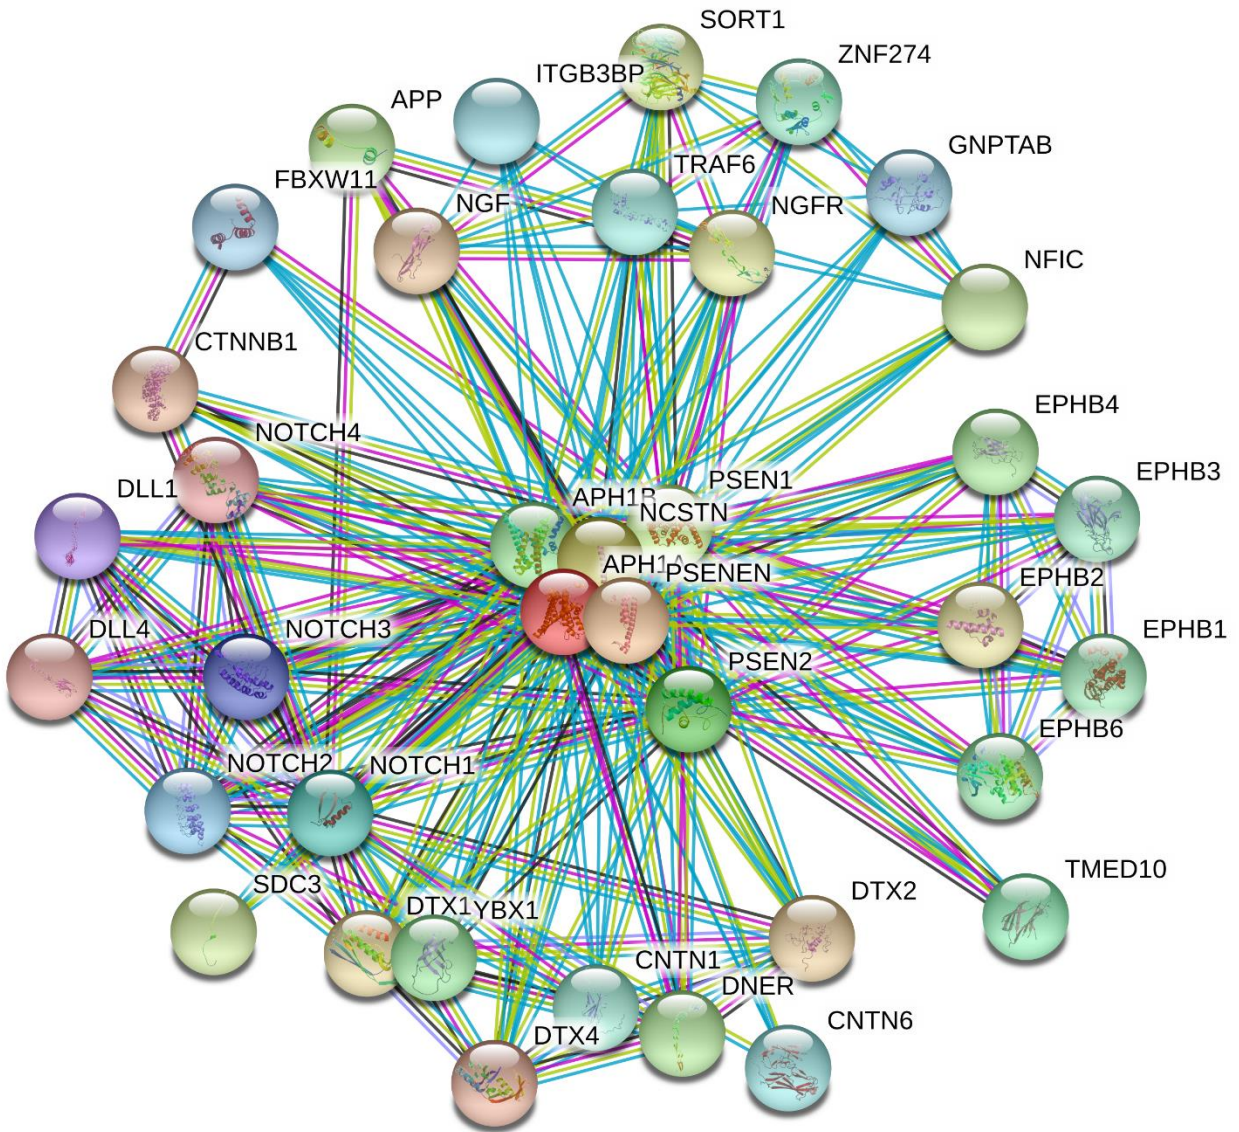

**Figure S1G**

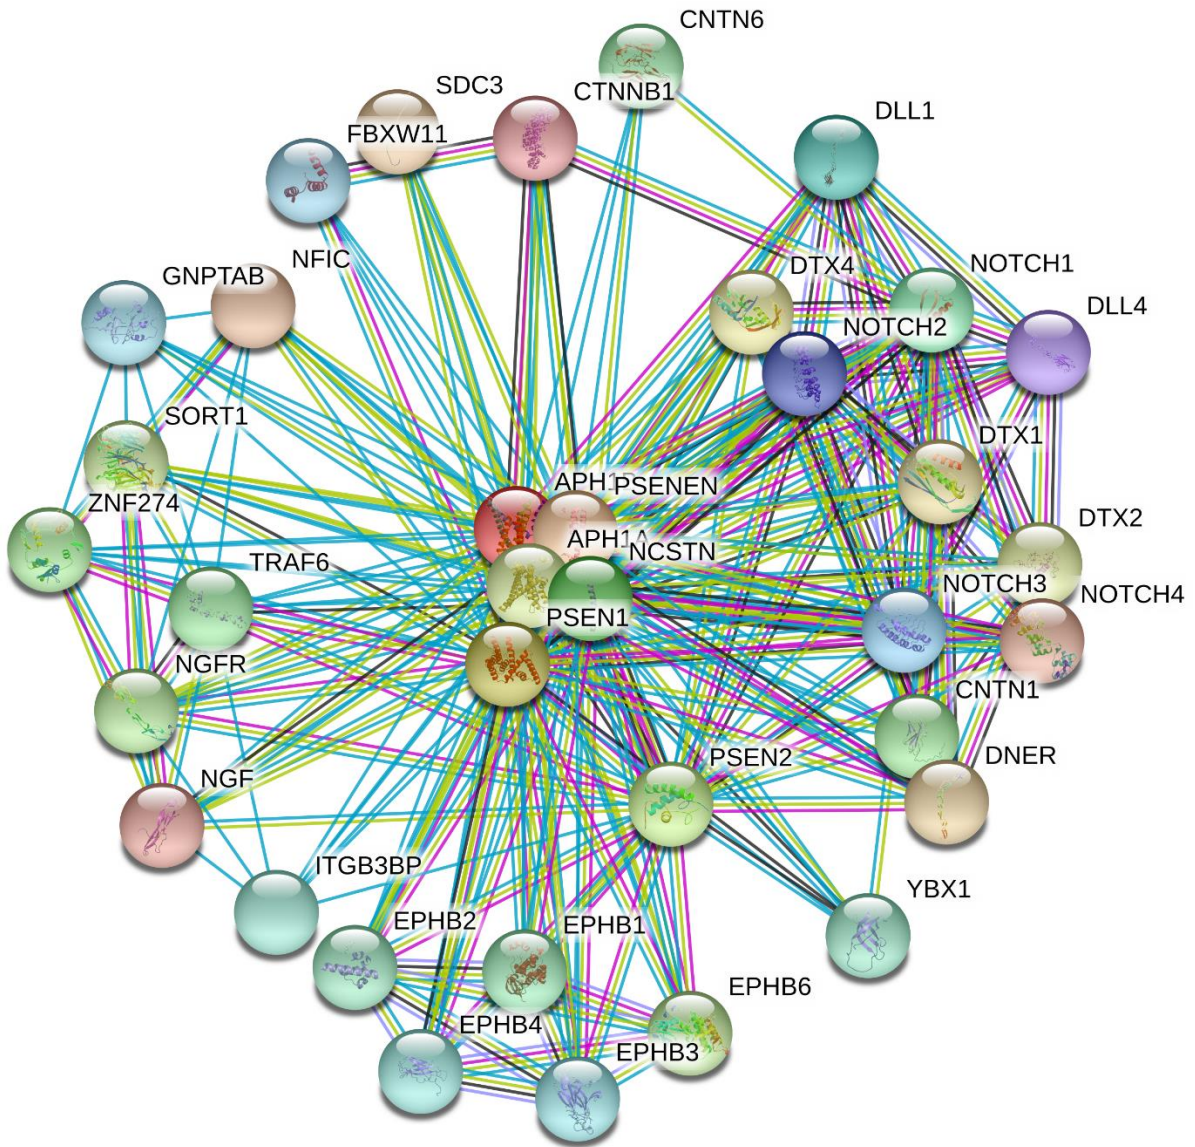

**Figure S1H**



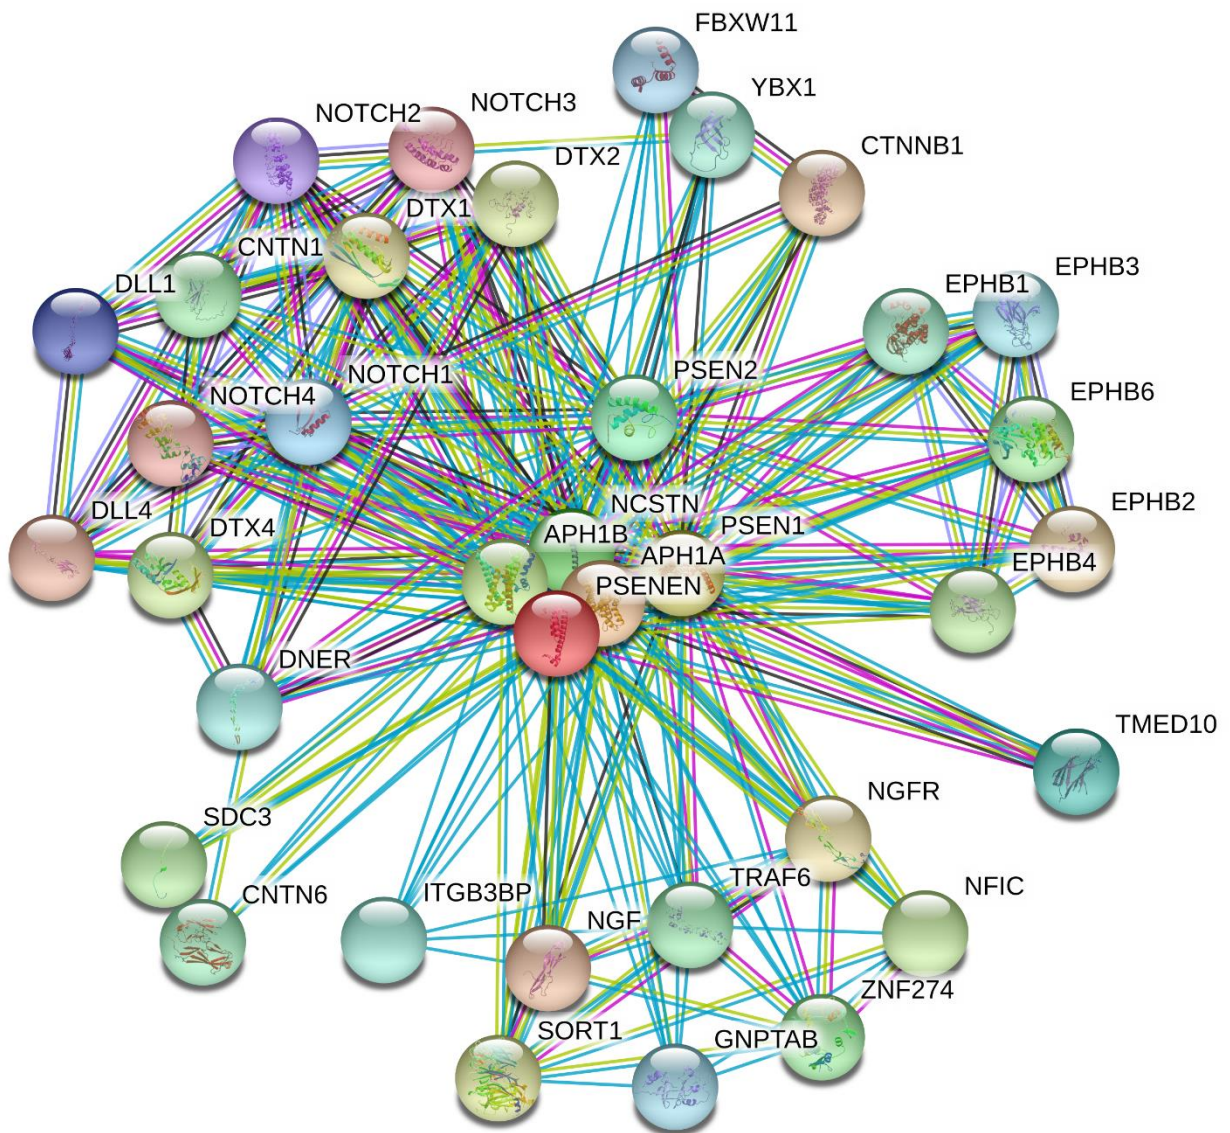

**Figure S1I**





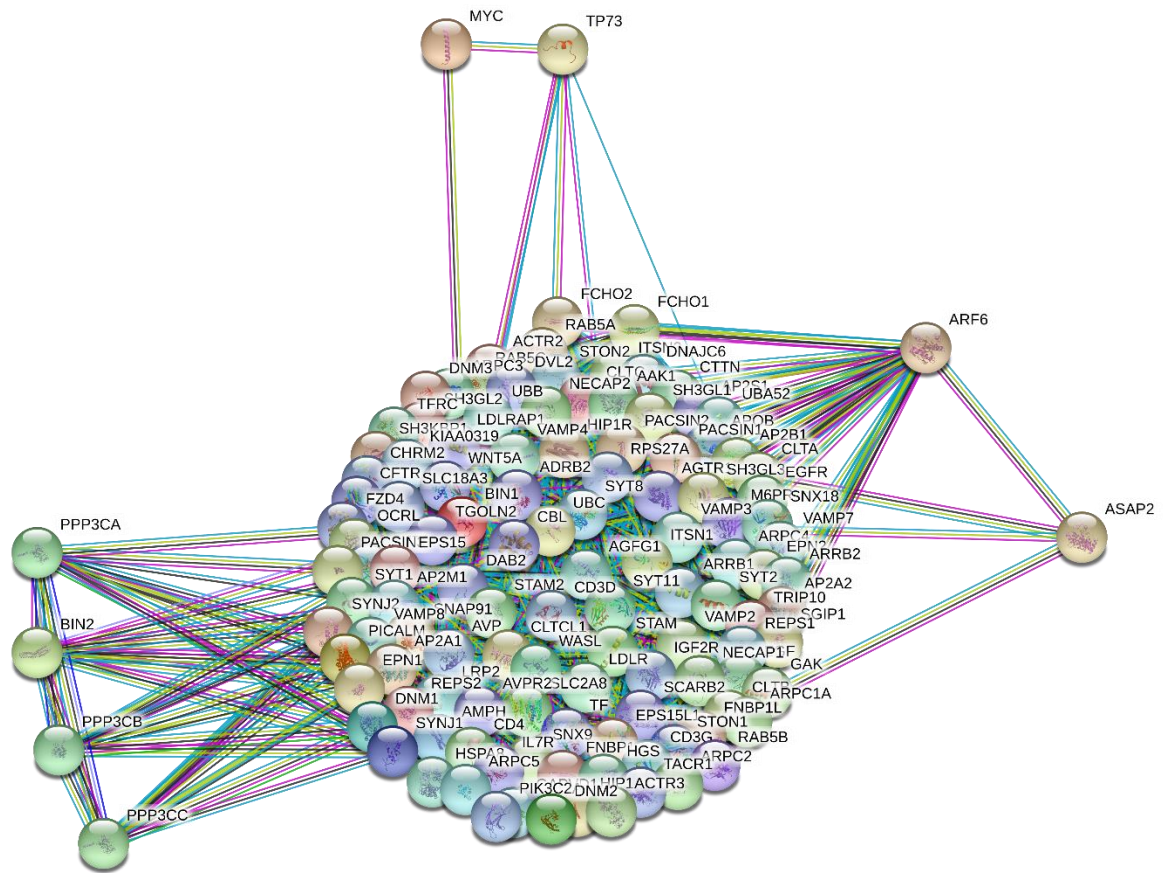

**Figure S1K**



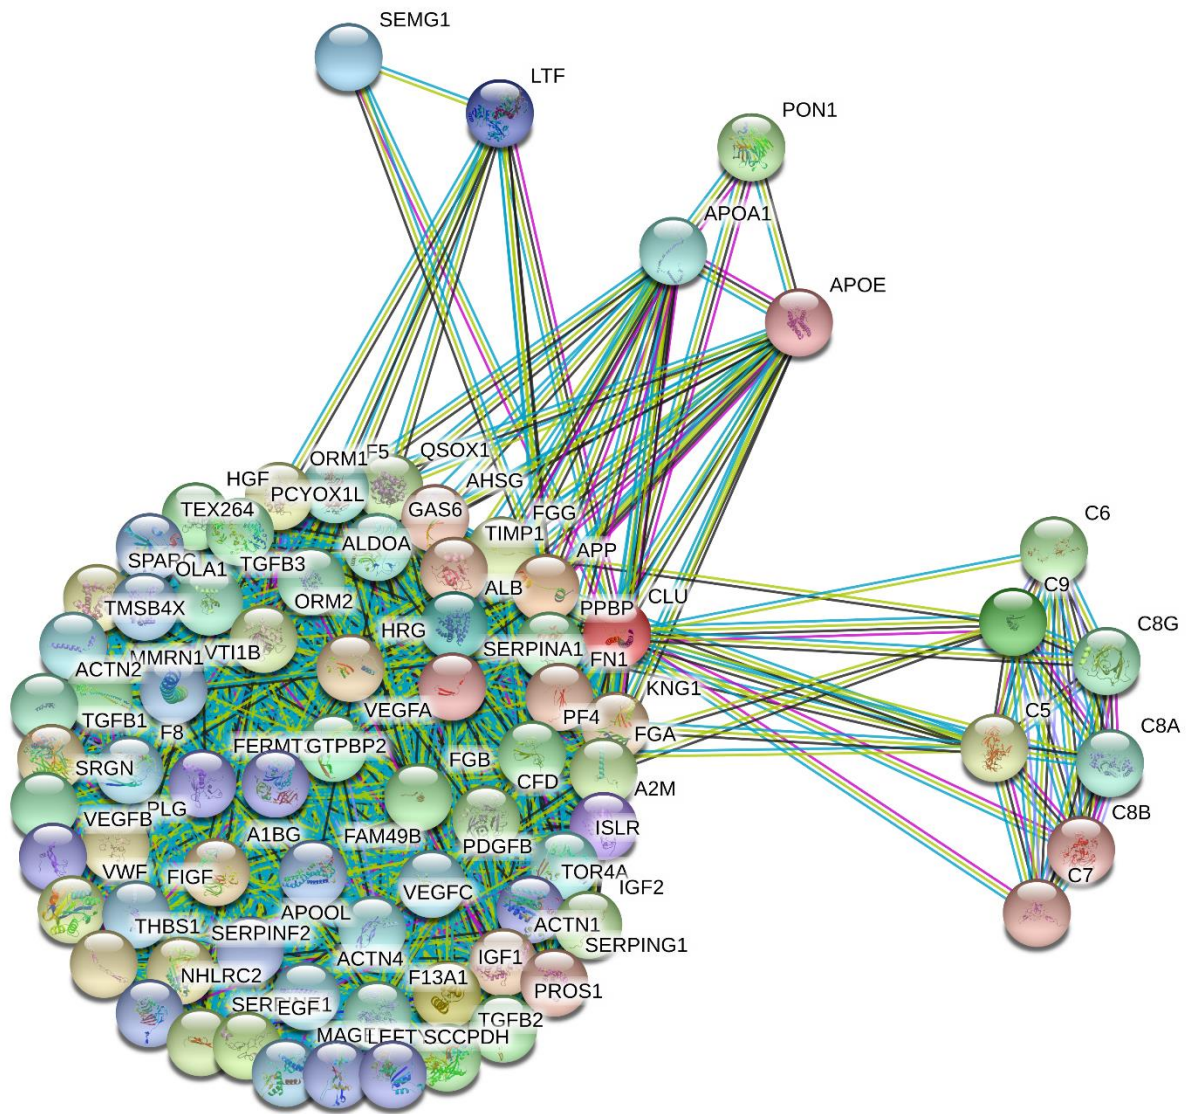

**Figure S1L**





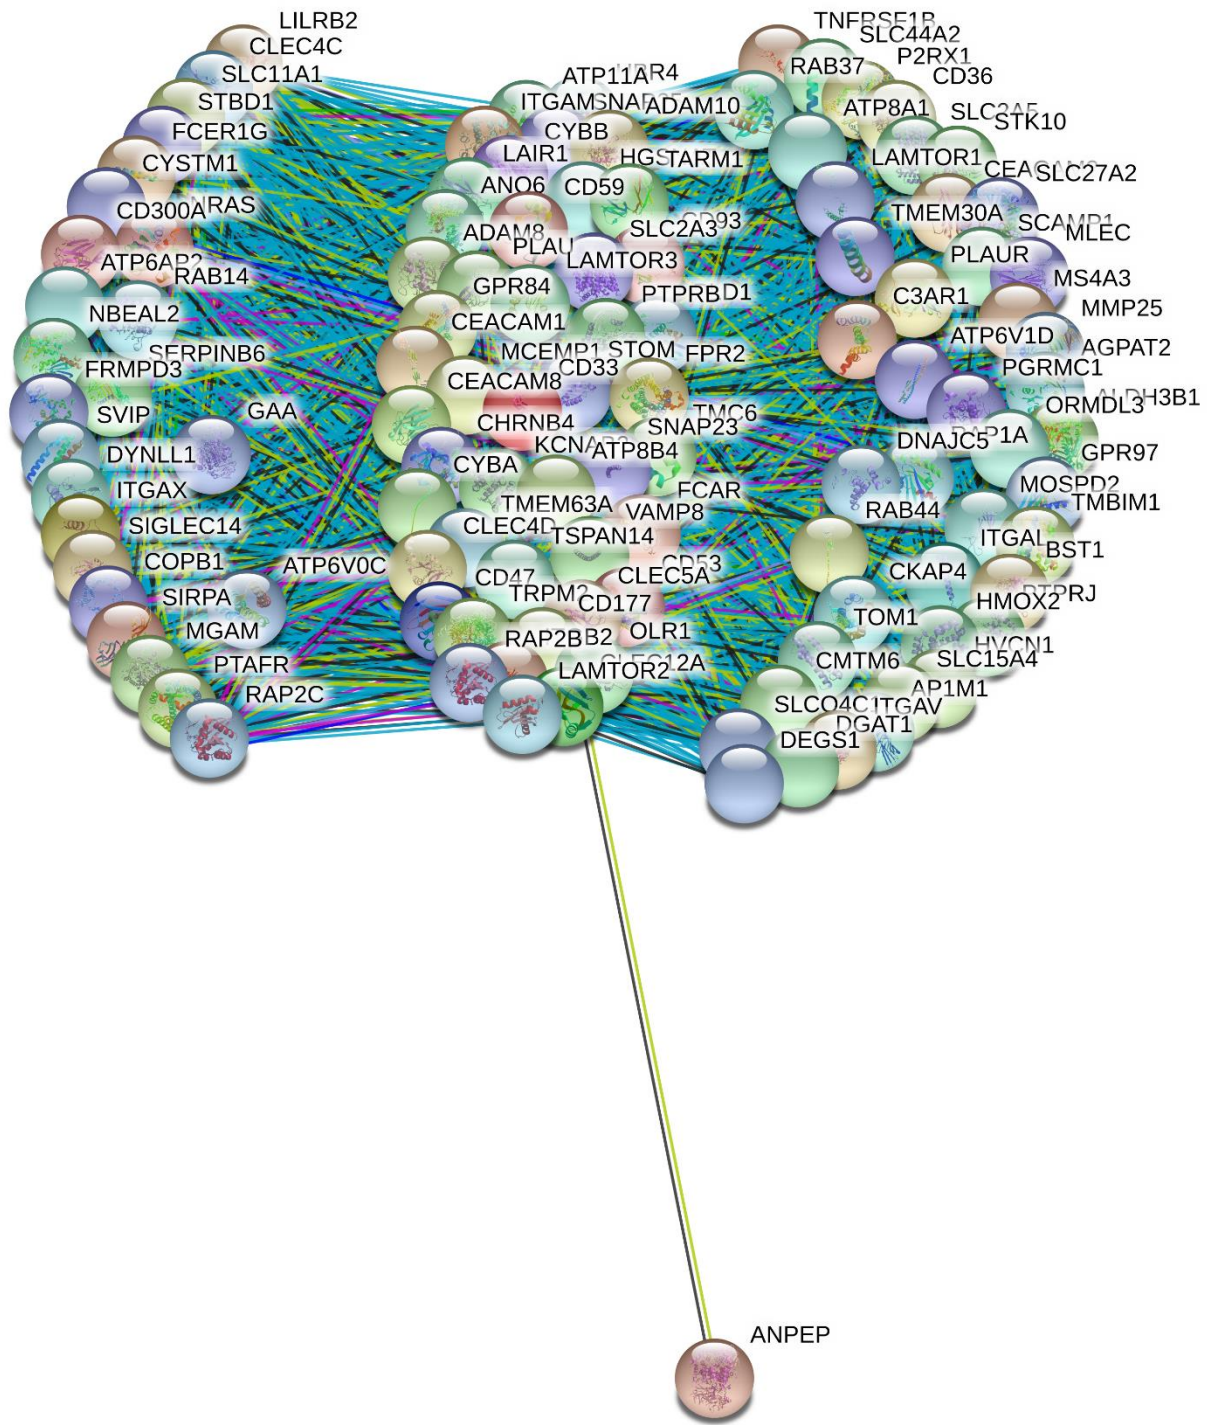

**Figure S1N**



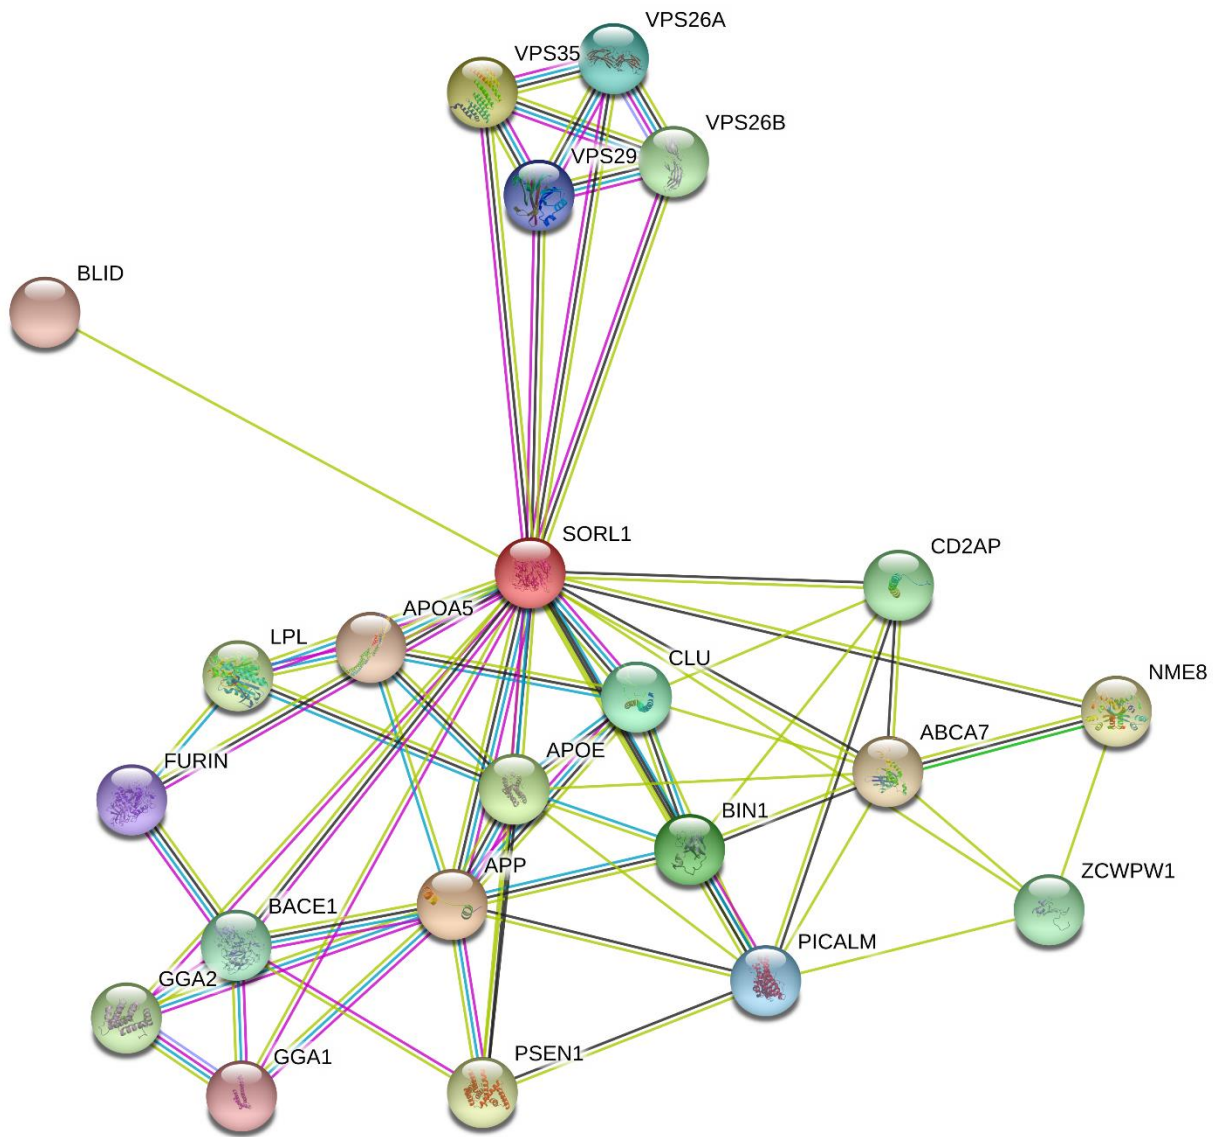

**Figure S10**

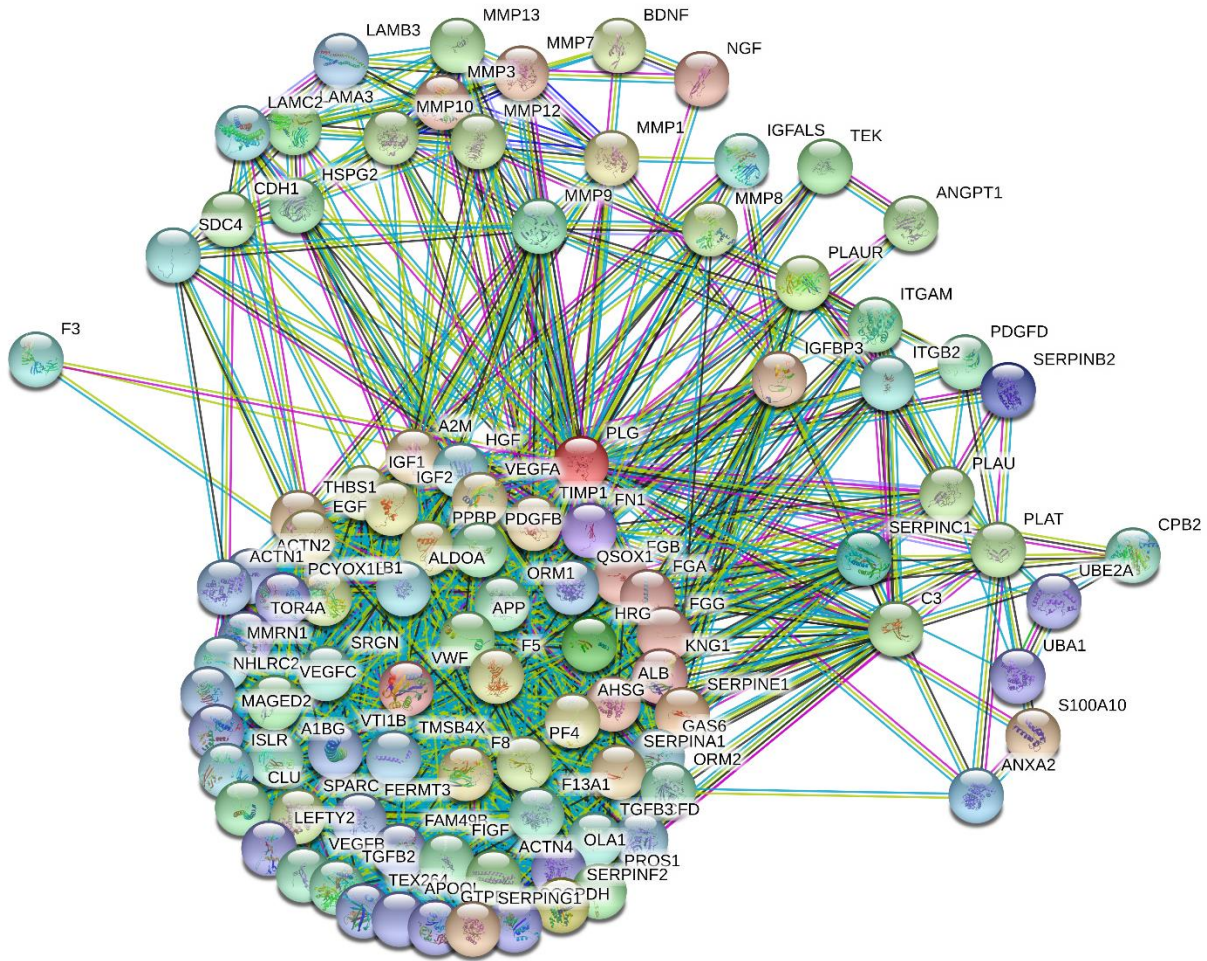

**Figure S1P**

**Supplementary Figure S1. Analysis of the interactivity of proteins involved in the amyloid cascade hypothesis.** The STRING resource was used to study the interactions of each protein involved in the amyloid cascade hypothesis. (A) APP, (B) ADAM17, (C) BACE1, (D) PSEN1, (E) PSEN2, (F) Nicastrin, (G) APH1A, (H) APH1B, (I) PEN2, (J) APOE4, (K) BIN1, (L) Clusterin, (M) PICALM, (N) CD33, (O) SORL1, and (P) PLG.



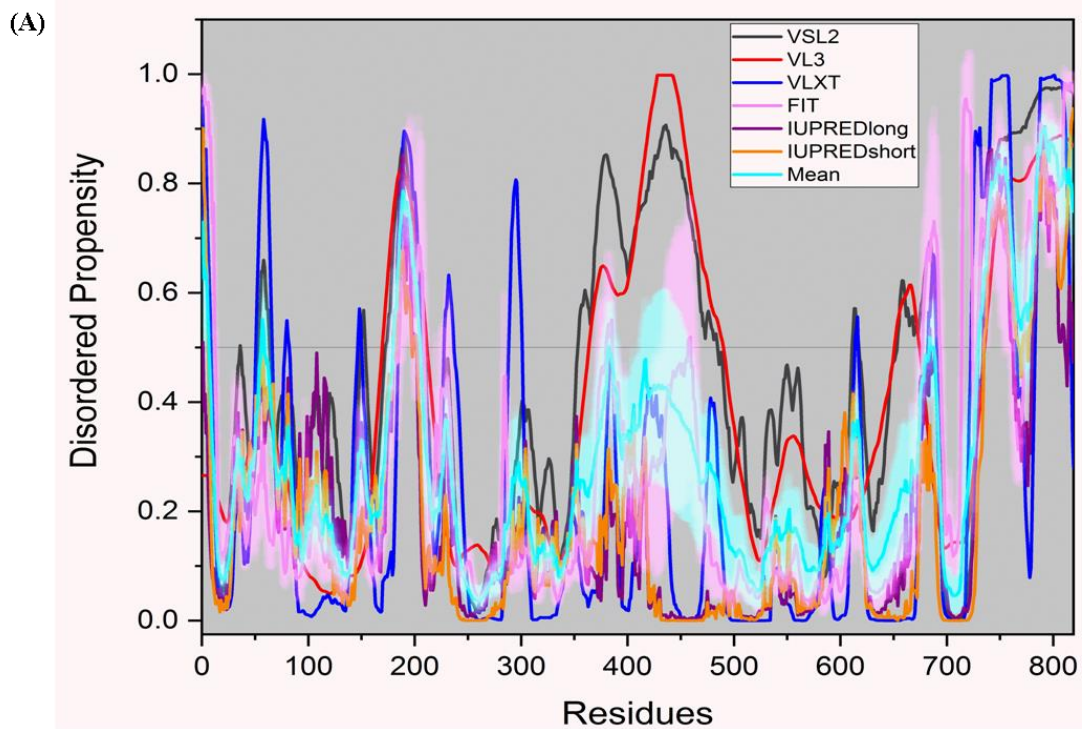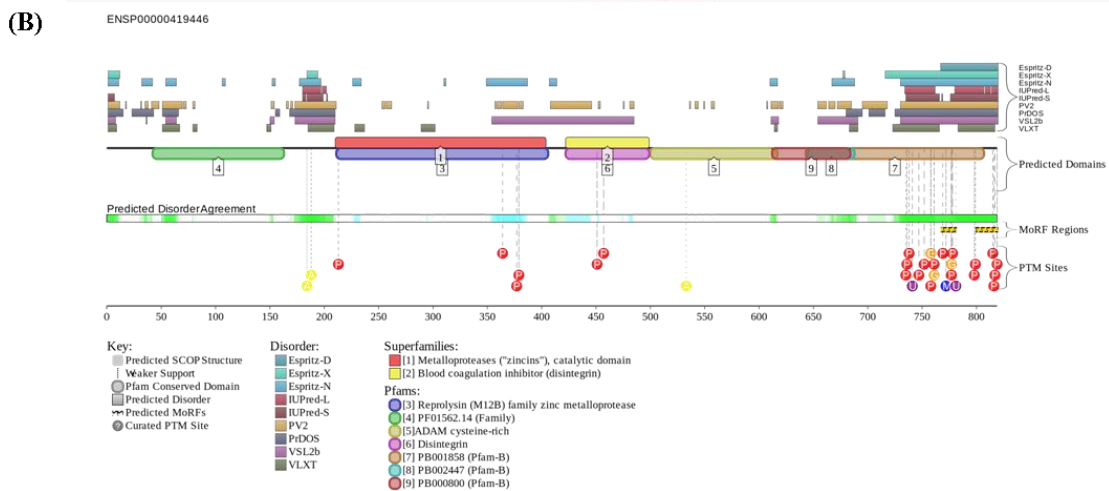

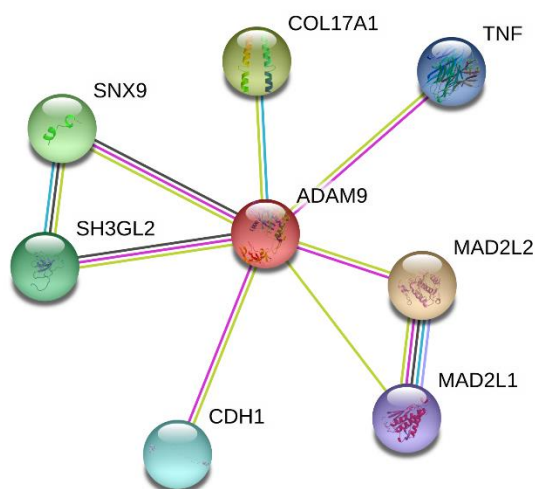

(C)

**Supplementary Figure S2. Evaluation of intrinsic disorder propensity of ADAM9 (UniProt ID: Q13443):** (A) Disorder profile generated by PONDR<sup>®</sup> VSL2 (grey line), PONDR<sup>®</sup> VL3 (red line), PONDR<sup>®</sup> VLXT (blue line), PONDR<sup>®</sup> FIT (magenta line), IUPRED long (purple line) and IUPRED short (orange line). The cyan line represents the mean disorder propensity calculated using the disorder scores from all six predictors. The light magenta shadow region represents the PONDR<sup>®</sup> FIT error distribution and the light cyan region represents the mean error distribution. (B) Evaluation of MoRF sites and PTMs in ADAM9 by D<sup>2</sup>P<sup>2</sup>. (C) STRING-generated PPI network using the high confidence level of 0.7 includes 8 nodes connected by 9 edges. This network is characterized by the average node degree of 2.25 and an average clustering coefficient of 0.887. The most common biological processes include positive regulation of membrane protein ectodomain proteolysis, regulation of protein catabolic process, lipid tube assembly, negative regulation of ubiquitin protein ligase activity, and regulation of transferase activity, whereas the most common molecular functions associated with the this PPI network are identical protein binding, enzyme binding, protein kinase binding, cell adhesion molecule binding, protein homodimerization activity.



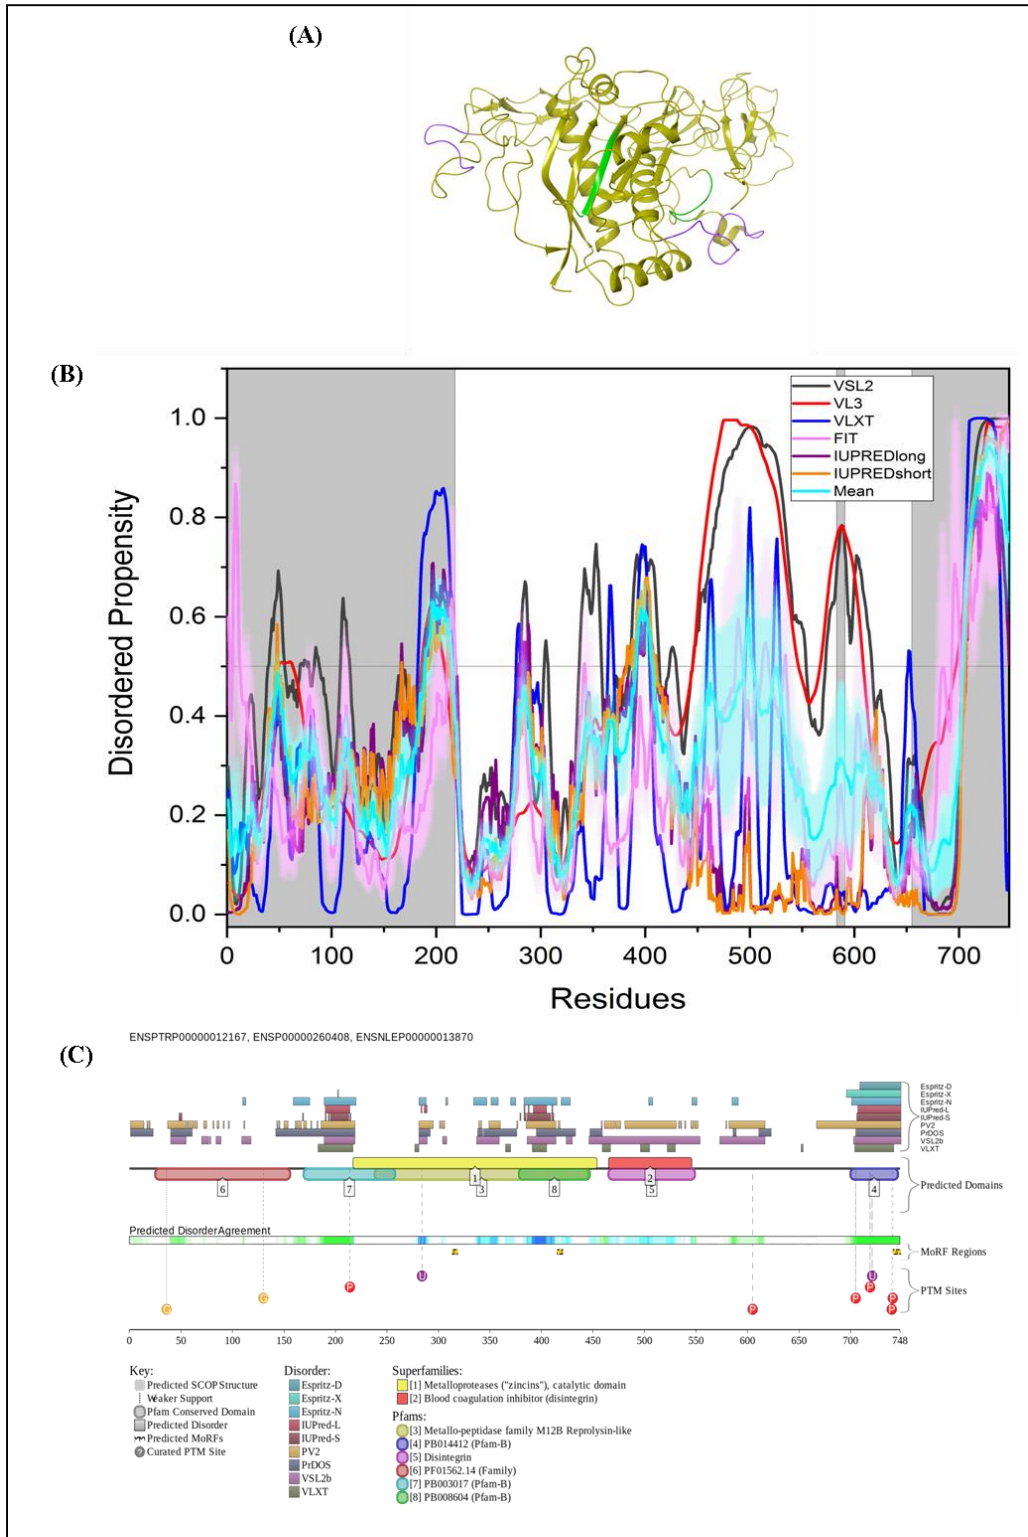

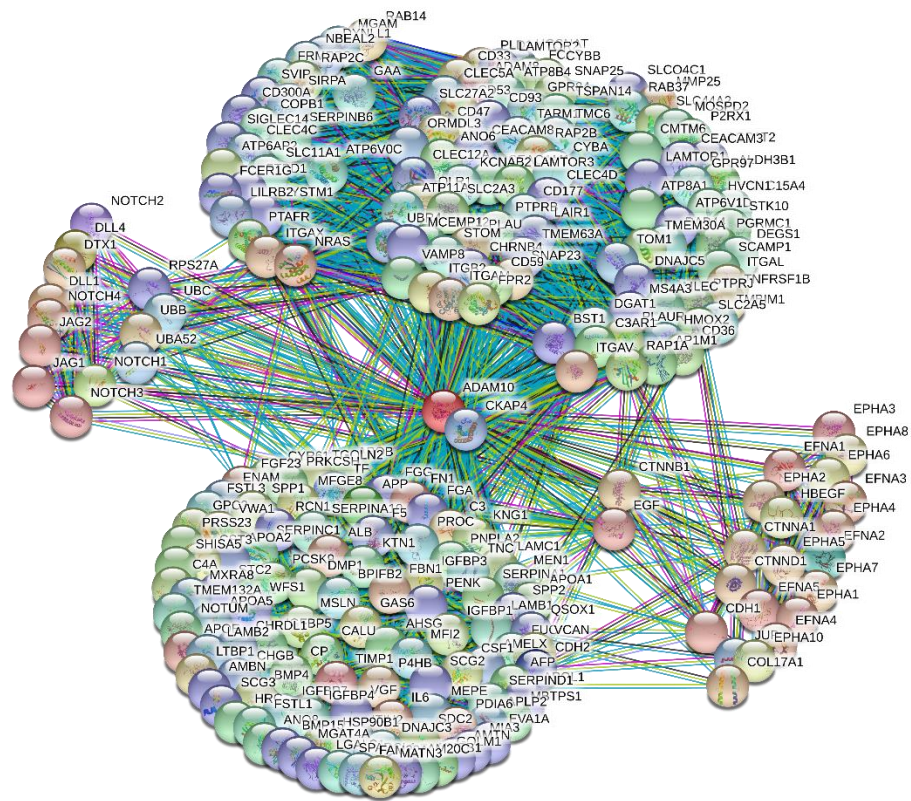

(D)

**Supplementary Figure S3. Evaluation of intrinsic disorder propensity of ADAM10 (UniProt ID: O14672).** (A) 2.80 Å resolution structure of ADAM10 residues 214-654 (PDB ID: 6BE6). The IDPRs (violet color) and MoRF regions (green color) are mapped on the protein structure (olive color). (B) Disorder profile generated by PONDR<sup>®</sup> VSL2 (grey line), PONDR<sup>®</sup> VL3 (red line), PONDR<sup>®</sup> VLXT (blue line), PONDR<sup>®</sup> FIT (magenta line), IUPRED long (purple line) and IUPRED short (orange line). The cyan line represents the mean disorder propensity calculated using the disorder scores from all six predictors. The light magenta shadow region represents the PONDR<sup>®</sup> FIT error distribution and the light cyan region represents the mean error distribution. The grey shaded area of the graph represents residues which are either missing in the PDB structure or the residues for which no structure is available. (C) Evaluation of MoRF sites and PTMs in ADAM10 by D<sup>2</sup>P<sup>2</sup>. (D) STRING-generated PPI network using the highest confidence level of 0.9 includes 253 nodes connected by 11,370 edges, which significantly exceeds the number of edges (1,391) expected for a random set of proteins of similar size. This network is characterized by the average node degree of 89.9, an average clustering coefficient of 0.928, and PPI enrichment p-value < 10<sup>-16</sup>. Most common biological processes associated with this network include regulated exocytosis, neutrophil mediated immunity, neutrophil degranulation, exocytosis, and cell activation involved in immune response, and top 5 molecular functions are signaling receptor binding, ephrin receptor activity, cell adhesion molecule binding, protein binding, and peptidase inhibitor activity.





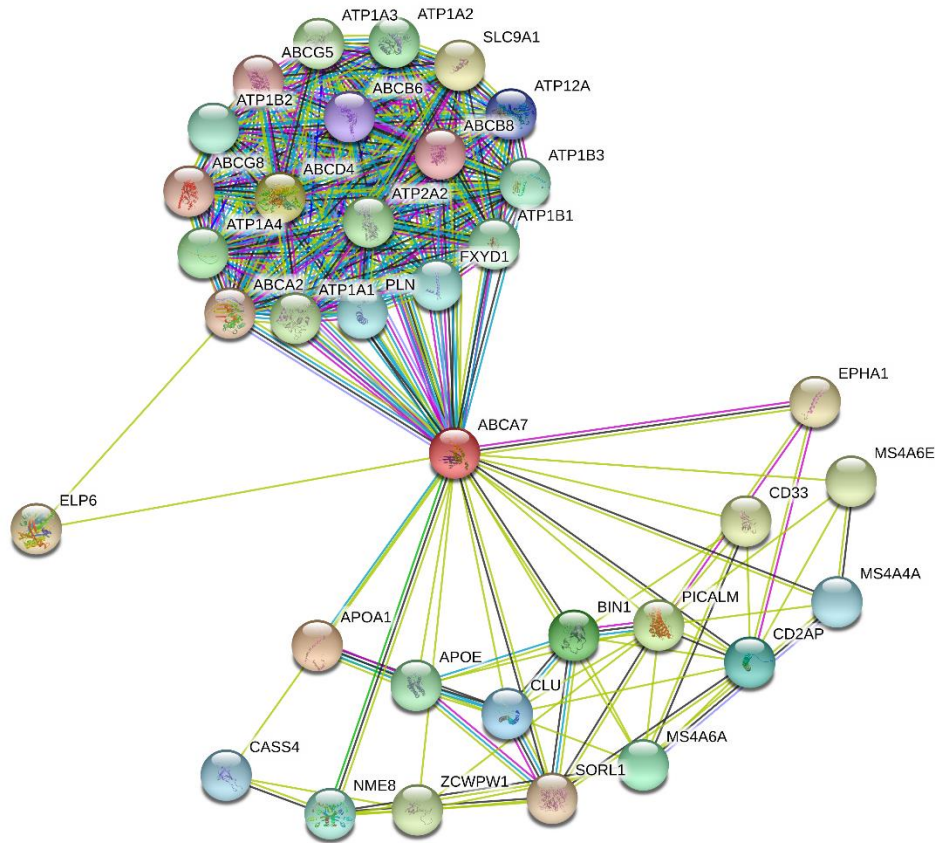

(C)

**Supplementary figure 4. Evaluation of intrinsic disorder propensity of ABCA7 (UniProt ID; Q8IZY2):** (A) Disorder profile generated by PONDR<sup>®</sup> VSL2 (grey line), PONDR<sup>®</sup> VL3 (red line), PONDR<sup>®</sup> VLXT (blue line), PONDR<sup>®</sup> FIT (magenta line), IUPRED long (purple line) and IUPRED short (orange line). The cyan line represents the mean disorder propensity calculated using the disorder scores from all six predictors. The light magenta shadow region represents the PONDR<sup>®</sup> FIT error distribution and the light cyan region represents the mean error distribution. (B) Evaluation of MoRF sites and PTMs in ABCA7 by D<sup>2</sup>P<sup>2</sup>. (C) STRING-generated PPI network using high confidence level of 0.7 includes 35 nodes connected by 237 edges, which significantly exceeds the number of edges (36) expected for a random set of proteins of similar size. This network is characterized by the average node degree of 13, an average clustering coefficient of 0.882, and PPI enrichment p-value < 10<sup>-16</sup>. Most common biological processes associated with the this network include establishment or maintenance of transmembrane electrochemical gradient, sodium ion export across plasma membrane, transmembrane transport, cellular sodium ion homeostasis, and ATP hydrolysis coupled ion transmembrane transport, and top 5 molecular functions are ATPase activity, coupled to transmembrane movement of substances, active transmembrane transporter activity, sodium:potassium-exchanging ATPase activity, ATPase activity, coupled to transmembrane movement of ions, phosphorylative mechanism, and transporter activity.



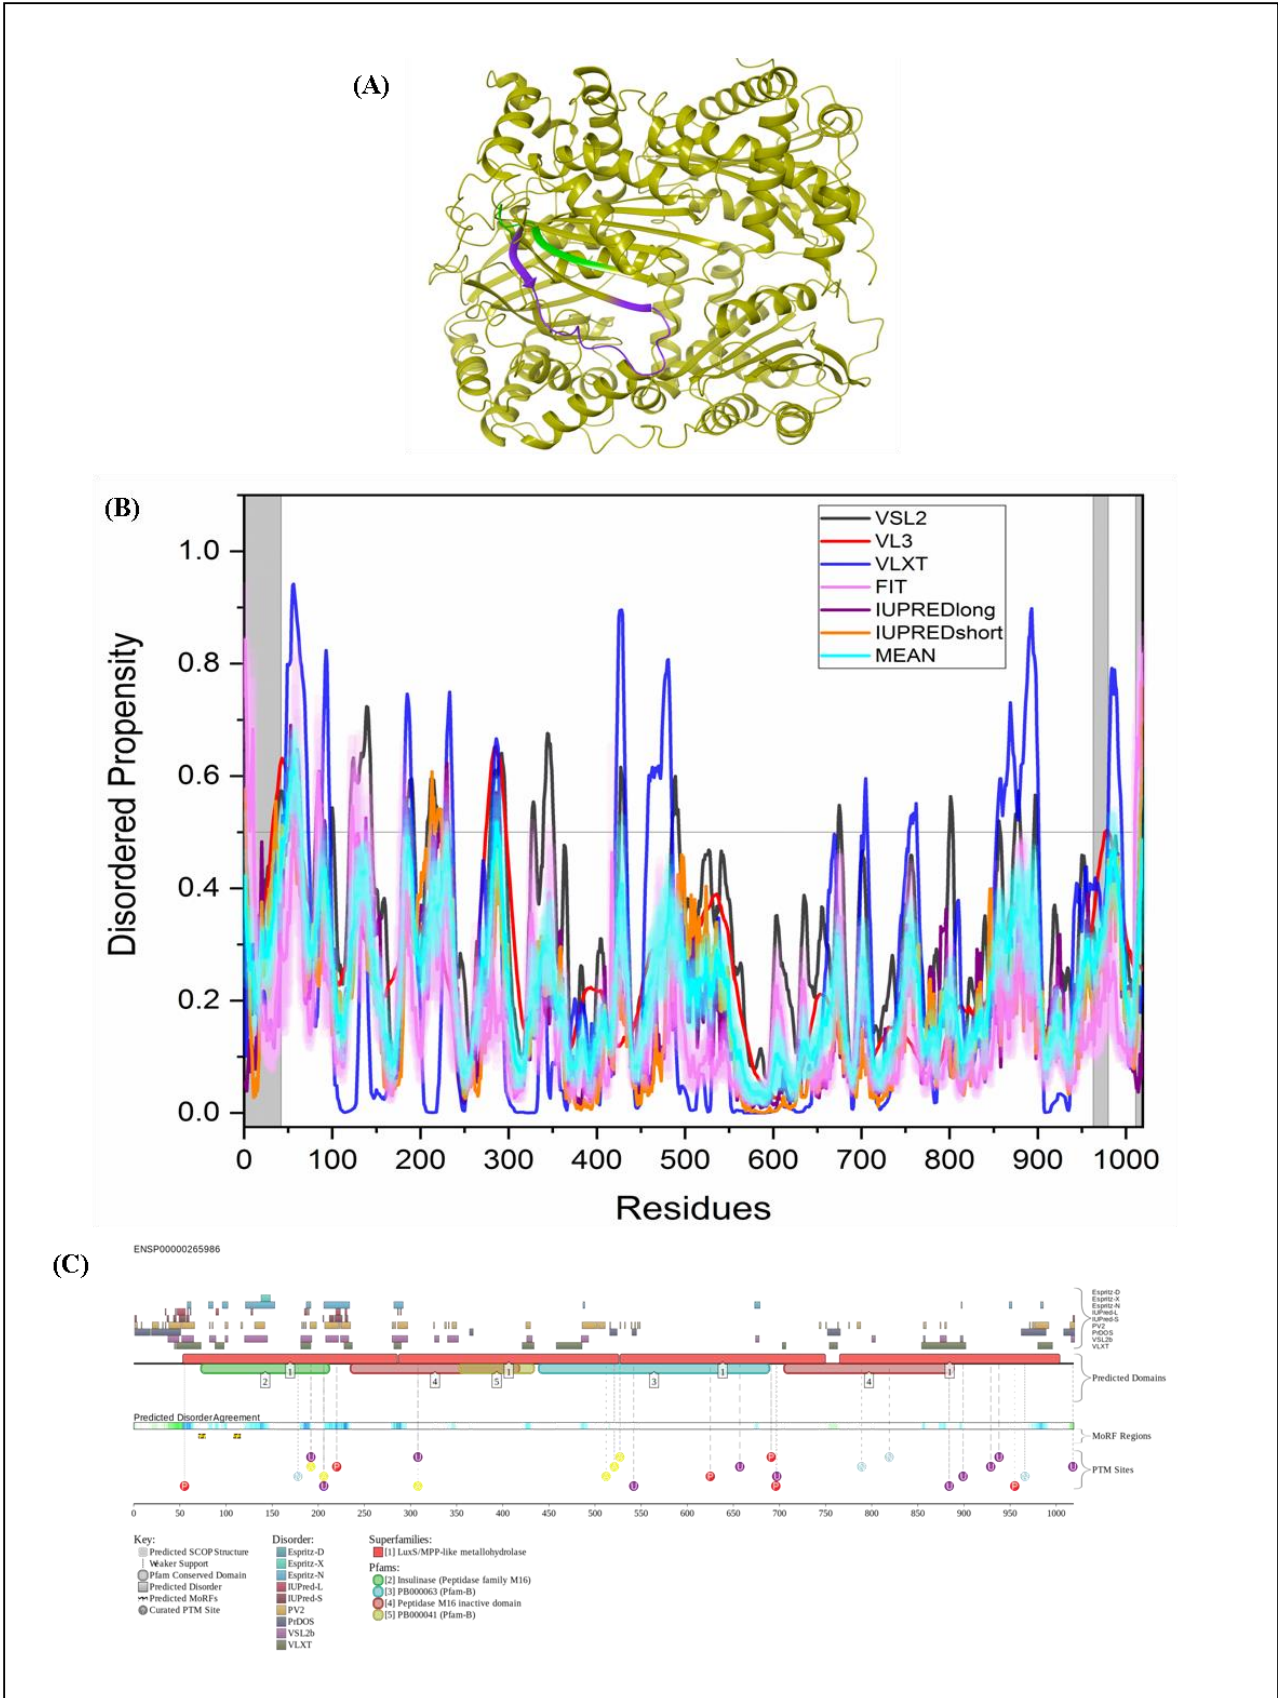

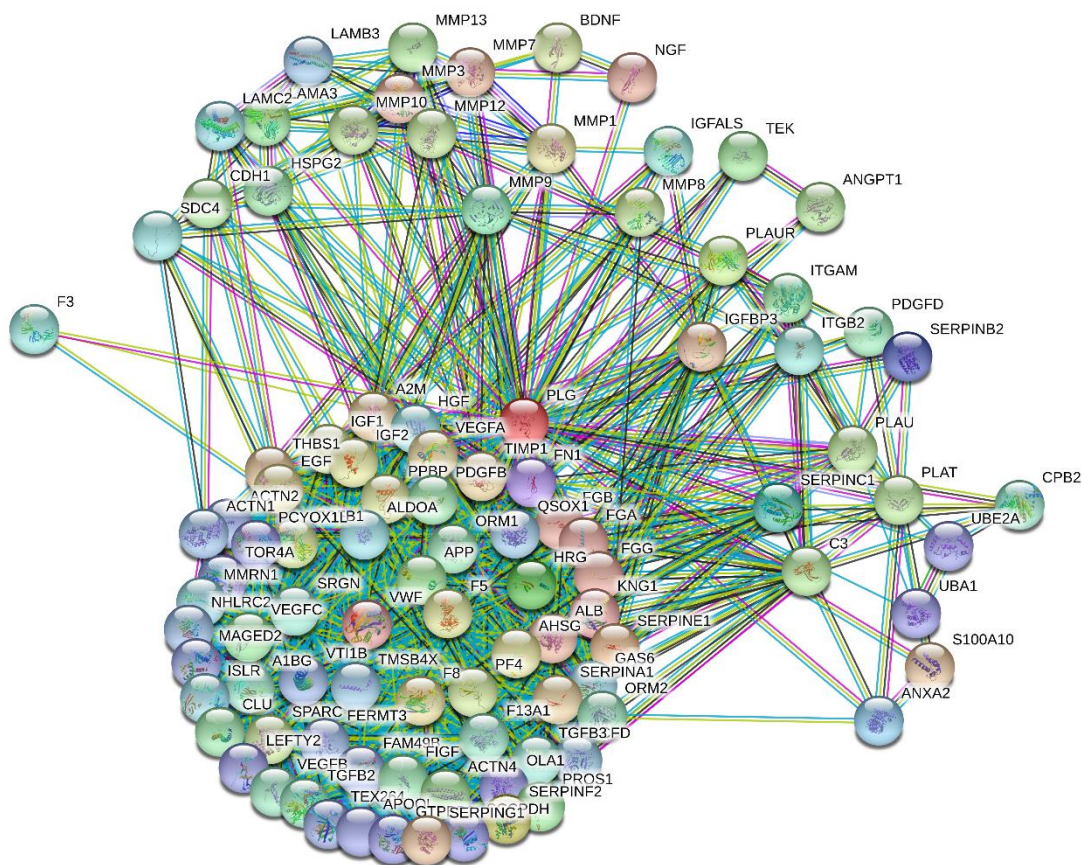

(D)

**Supplementary Figure S5. Evaluation of intrinsic disorder propensity of IDE (UniProt ID: P14735):** (A) 1.96 Å resolution structure of IDE residues 42-1019 (PDB ID: 3CWW). The IDPRs (violet color) and MoRF regions (green color) are mapped on the protein structure (olive color). (B) Disorder profile generated by PONDR<sup>®</sup> VSL2 (grey line), PONDR<sup>®</sup> VL3 (red line), PONDR<sup>®</sup> VLXT (blue line), PONDR<sup>®</sup> FIT (magenta line), IUPRED long (purple line) and IUPRED short (orange line). The cyan line represents the mean disorder propensity calculated using the disorder scores from all six predictors. The light magenta shadow region represents the PONDR<sup>®</sup> FIT error distribution and the light cyan region represents the mean error distribution. The grey shaded area of the graph represents residues which are either missing in the PDB structure or the residues for which no structure is available. (C) Evaluation of MoRF sites and PTMs in IDE by D<sup>2</sup>P<sup>2</sup>. (D) STRING-generated PPI network using the highest confidence level of 0.9 includes 66 nodes connected by 1,357 edges, which significantly exceeds the number of edges (137) expected for a random set of proteins of similar size. This network is characterized by the average node degree of 41.1, an average clustering coefficient of 0.975, and PPI enrichment p-value < 10<sup>-16</sup>. Most common biological processes associated with the this network include protein targeting to peroxisome, protein targeting, establishment of protein localization to organelle, intracellular transport, and nitrogen compound transport, and top 5 molecular functions are signaling receptor binding, coenzyme binding, protein binding, catalytic activity, and CoA hydrolase activity.

(A)

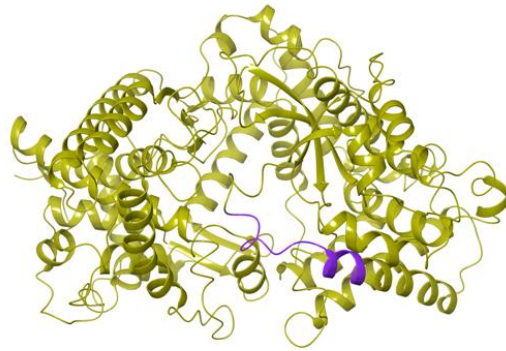

(B)

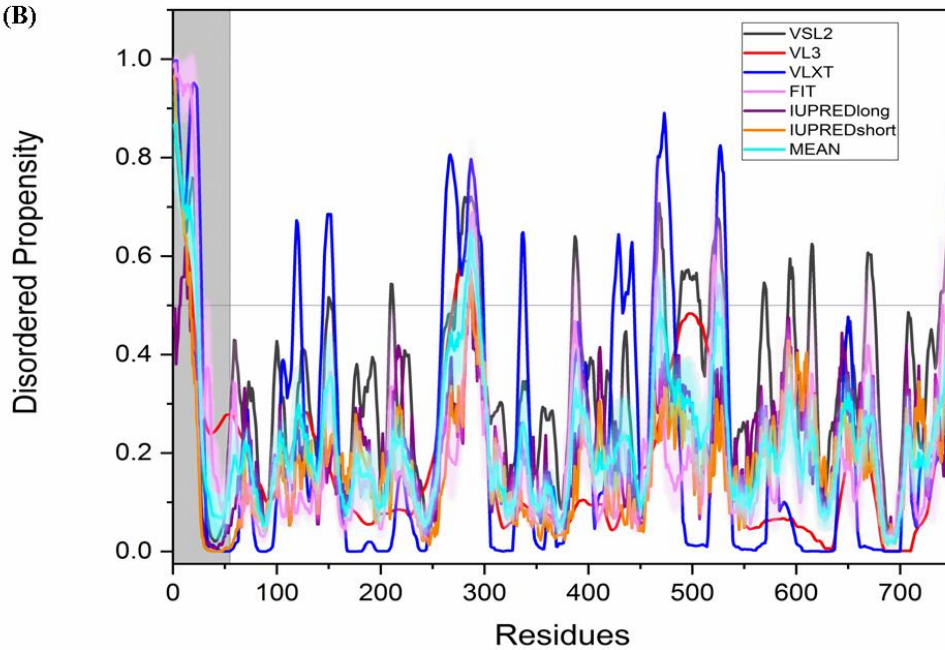

ENSP00000478173, ENSP00000420389, ENSP00000419653, ENSP00000418525, ENSP00000417079, ENSP00000353679

(C)

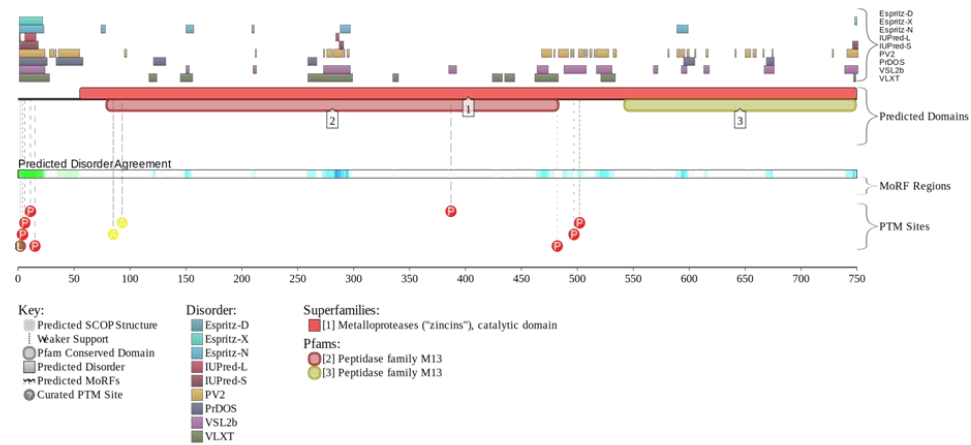





(A)

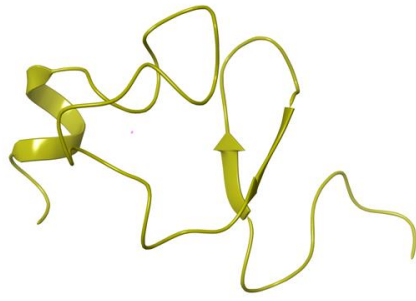

(B)

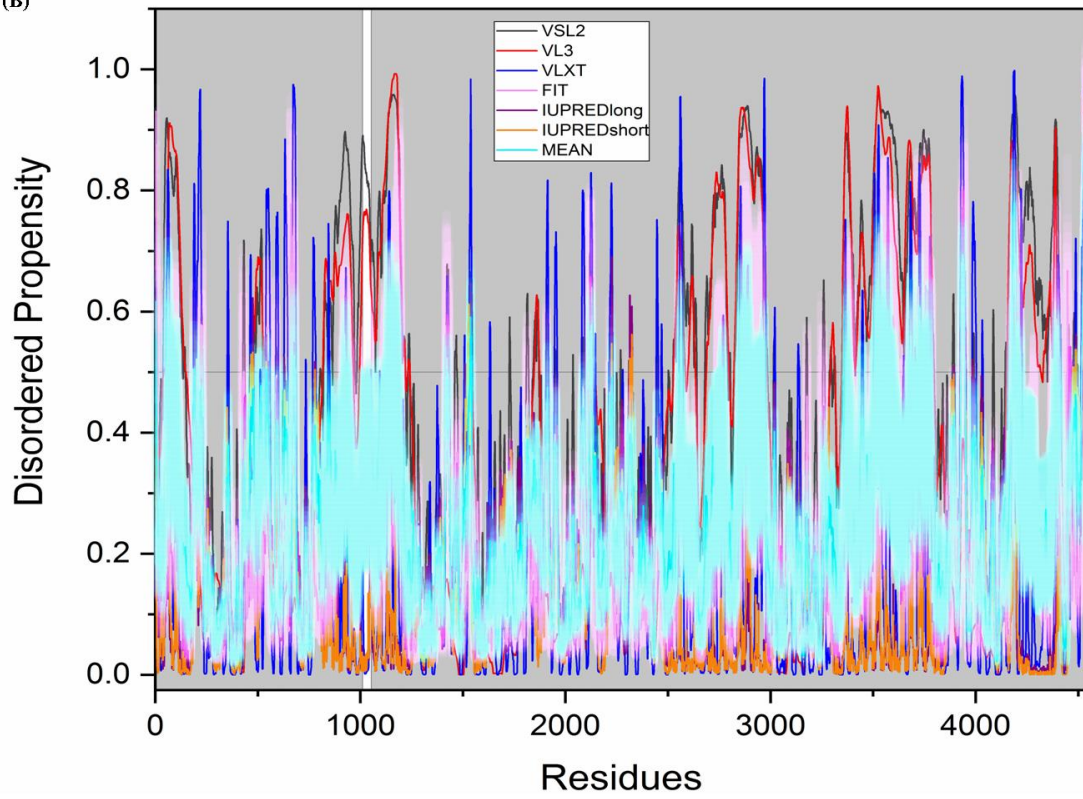

(C)

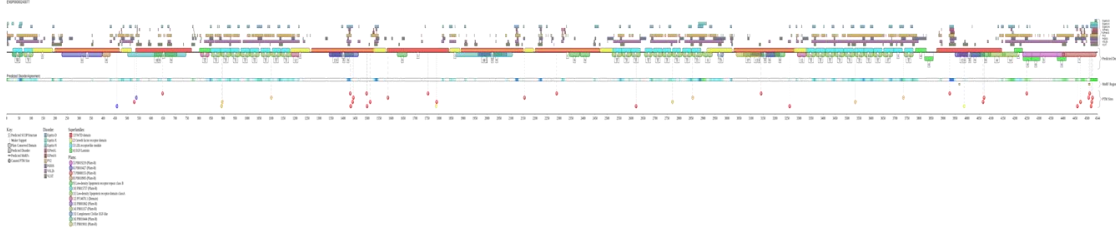

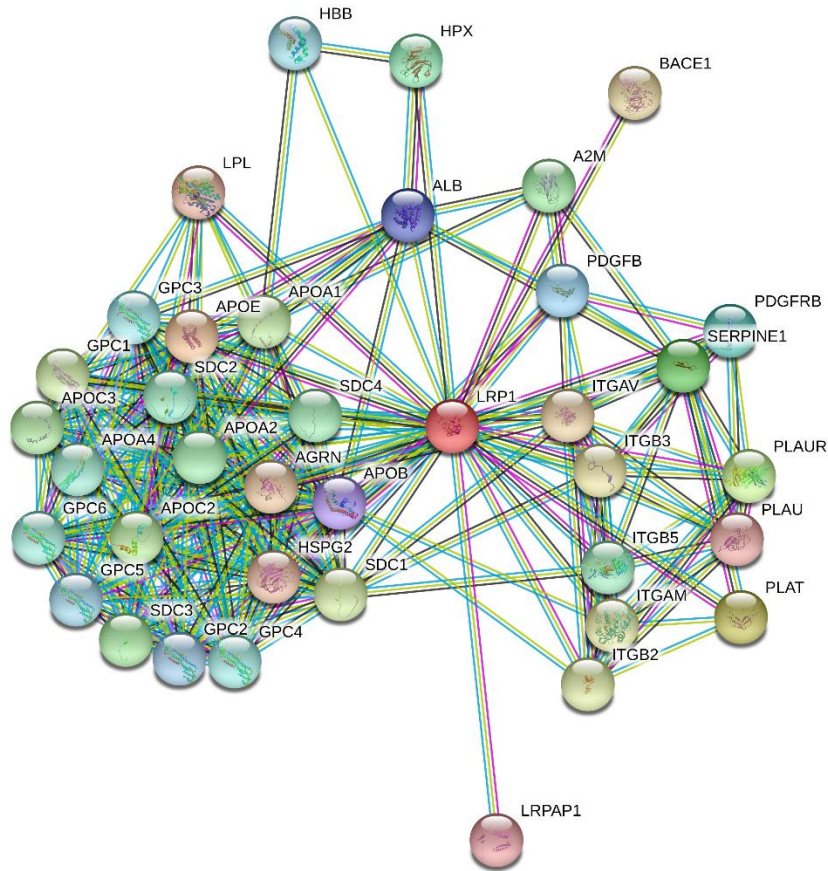

(D)

**Supplementary Figure S7. Evaluation of intrinsic disorder propensity of LRP1 (UniProt ID: Q07954):** (A) 1.85 Å resolution structure (olive color) of LRP1 residues 1011-1054 (PDB ID: 1J8E). (B) Disorder profile generated by PONDR<sup>®</sup> VSL2 (grey line), PONDR<sup>®</sup> VL3 (red line), PONDR<sup>®</sup> VLXT (blue line), PONDR<sup>®</sup> FIT (magenta line), IUPRED long (purple line) and IUPRED short (orange line). The cyan line represents the mean disorder propensity calculated using the disorder scores from all six predictors. The light magenta shadow region represents the PONDR<sup>®</sup> FIT error distribution and the light cyan region represents the mean error distribution. The grey shaded area of the graph represents residues for which no structure is available. (C) Evaluation of MoRF sites and PTMs in LRP1 by D<sup>2</sup>P<sup>2</sup>. (D) STRING-generated PPI network using the highest confidence level of 0.9 includes 38 nodes connected by 275 edges, which significantly exceeds the number of edges (49) expected for a random set of proteins of similar size. This network is characterized by the average node degree of 14.5, an average clustering coefficient of 0.812, and PPI enrichment p-value < 10<sup>-16</sup>. Most common biological processes associated with the this network include retinoid metabolic process, extracellular structure organization, cellular lipid metabolic process, glycosaminoglycan catabolic process, and glycosaminoglycan biosynthetic process, and top 5 molecular functions are lipoprotein particle receptor binding, cholesterol transporter activity, signaling receptor binding, phosphatidylcholine-sterol O-acyltransferase activator activity, and protein binding.





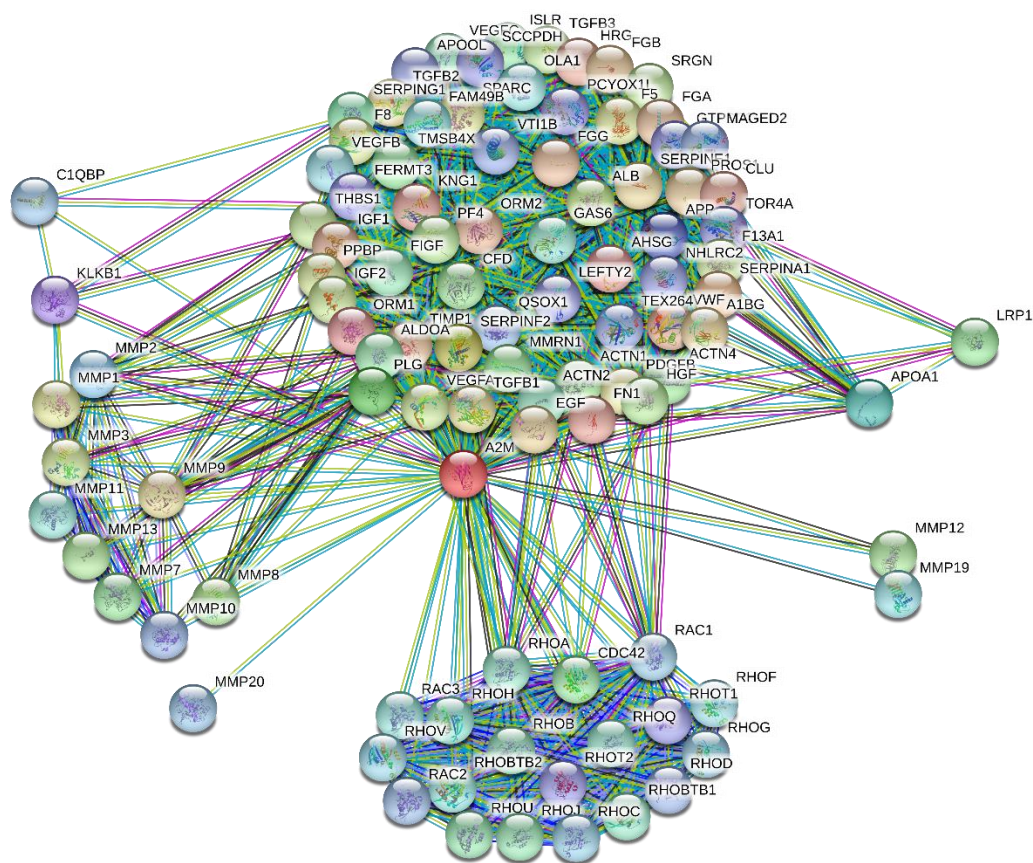

**Supplementary Figure S8. Evaluation of intrinsic disorder propensity of A2M (UniProt ID: P01023):** (A) 4.30 Å resolution structure of A2M residues 24-1474 (PDB ID: 4ACQ). The IDPRs (violet color) and MoRF regions (green color) are mapped on the protein structure (olive color). (B) Disorder profile generated by PONDRL<sup>®</sup> VSL2 (grey line), PONDRL<sup>®</sup> VL3 (red line), PONDRL<sup>®</sup> VLXT (blue line), PONDRL<sup>®</sup> FIT (magenta line), IUPRED long (purple line) and IUPRED short (orange line). The cyan line represents the mean disorder propensity calculated using the disorder scores from all six predictors. The light magenta shadow region represents the PONDRL<sup>®</sup> FIT error distribution and the light cyan region represents the mean error distribution. The grey shaded area of the graph represents residues for which no structure is available. (C) Evaluation of MoRF sites and PTMs in A2M by D<sup>2</sup>P<sup>2</sup>. (D) STRING-generated PPI network using the highest confidence level of 0.9 includes 100 nodes connected by 2,385 edges, which significantly exceeds the number of edges (236) expected for a random set of proteins of similar size. This network is characterized by the average node degree of 47.7, an average clustering coefficient of 0.943, and PPI enrichment p-value < 10<sup>-16</sup>. Most common biological processes associated with this network include platelet degranulation, regulated exocytosis, vesicle-mediated transport, transport, and extracellular structure organization, and top 5 molecular functions are signaling receptor binding, GTPase activity, nucleoside binding, GTP binding, and growth factor activity.

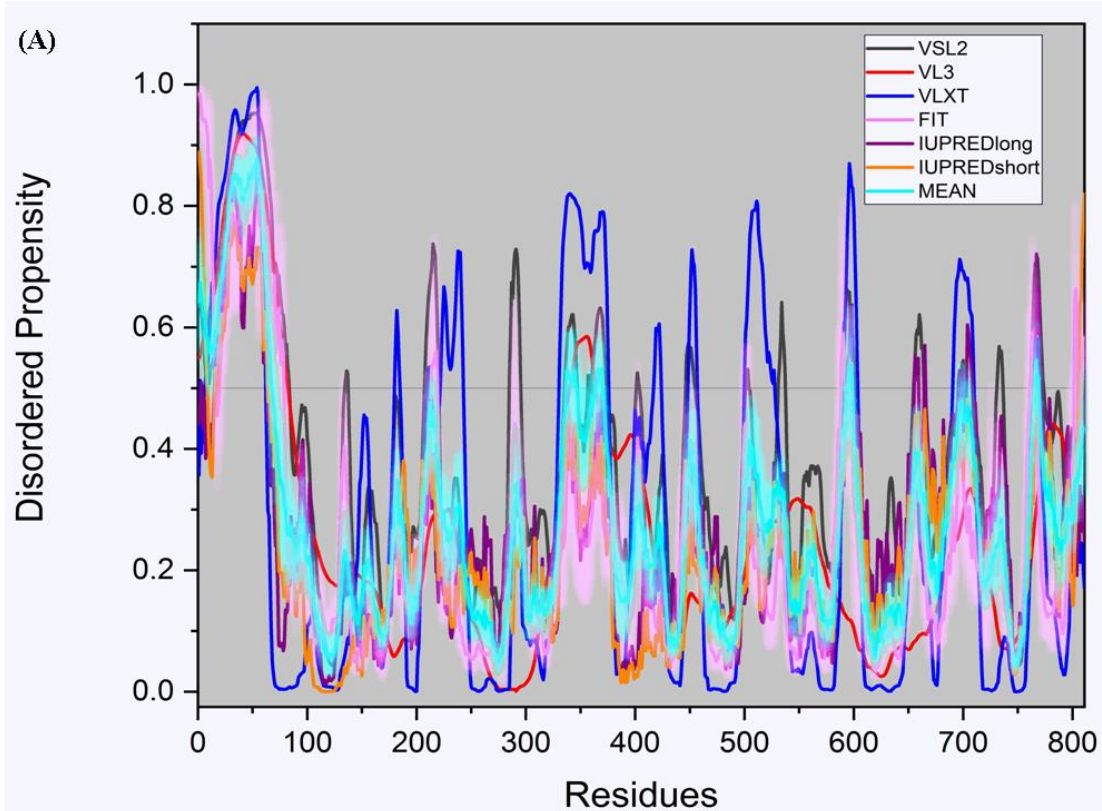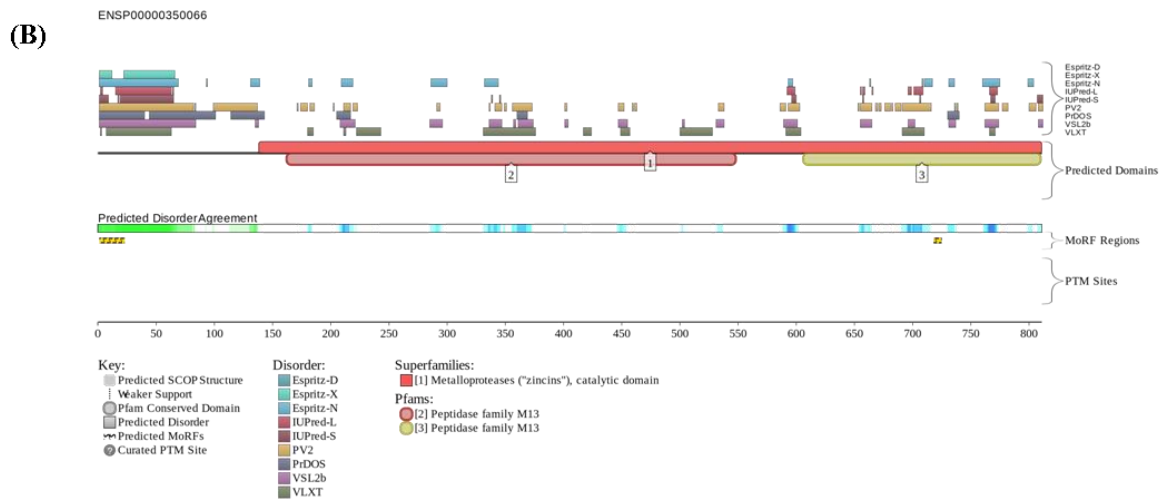



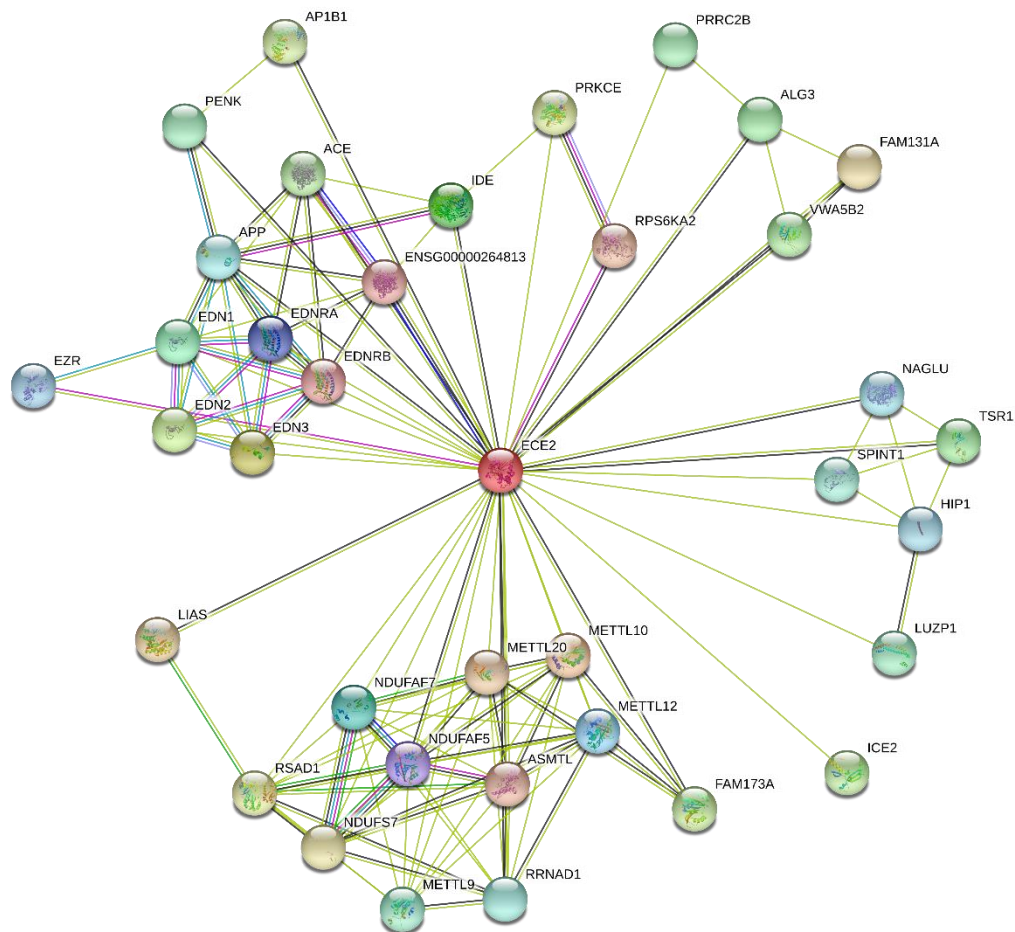

(C)

**Supplementary Figure S9. Evaluation of intrinsic disorder propensity of ECE2 (UniProt ID: P0DPD6):** (A) Disorder profile generated by PONDR<sup>®</sup> VSL2 (grey line), PONDR<sup>®</sup> VL3 (red line), PONDR<sup>®</sup> VLXT (blue line), PONDR<sup>®</sup> FIT (magenta line), IUPRED long (purple line) and IUPRED short (orange line). The cyan line represents the mean disorder propensity calculated using the disorder scores from all six predictors. The light magenta shadow region represents the PONDR<sup>®</sup> FIT error distribution and the light cyan region represents the mean error distribution. (B) Evaluation of MoRF sites and PTMs in ECE2 by D<sup>2</sup>P<sup>2</sup>. (C) STRING-generated PPI network using the medium confidence level of 0.4 includes 37 nodes connected by 128 edges, which significantly exceeds the number of edges (45) expected for a random set of proteins of similar size. This network is characterized by the average node degree of 6.92, an average clustering coefficient of 0.885, and PPI enrichment p-value < 10<sup>-16</sup>. Most common biological processes associated with this network include vascular smooth muscle contraction, vein smooth muscle contraction, methylation, regulation of blood vessel diameter, and regulation of systemic arterial blood pressure by endothelin, and top 5 molecular functions are methyltransferase activity, endothelin B receptor binding, N-methyltransferase activity, G protein-coupled receptor binding, and S-adenosylmethionine-dependent methyltransferase activity.

(A)

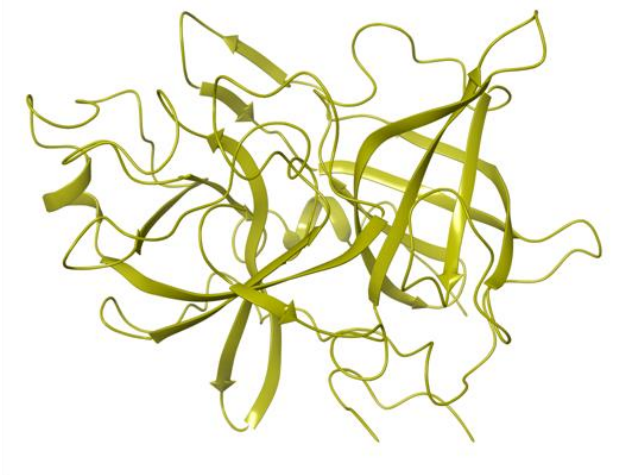

(B)

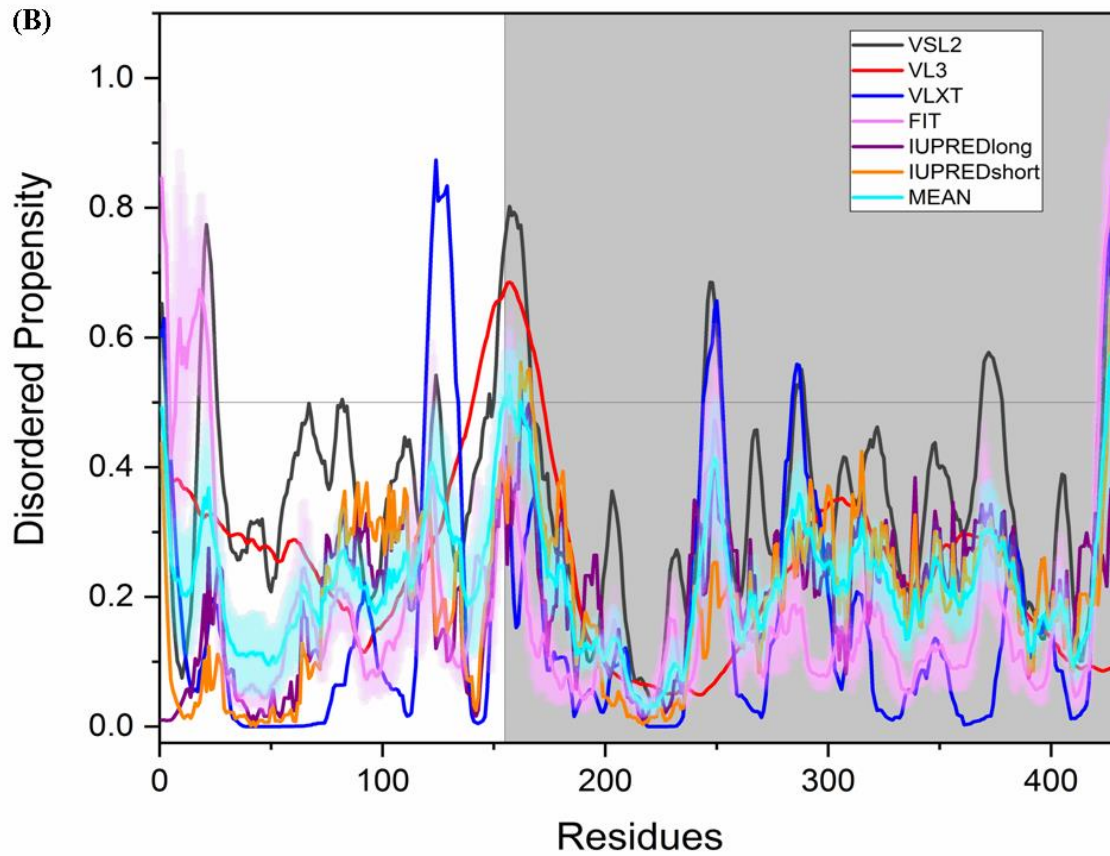

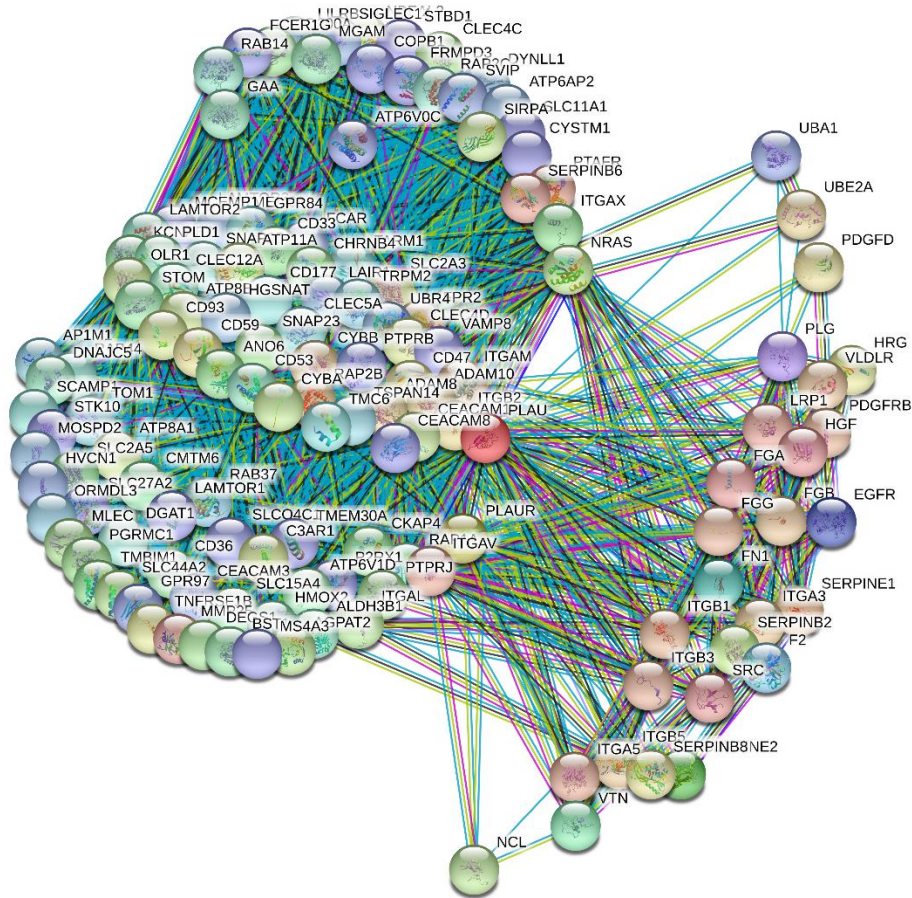

(C)

**Supplementary Figure S10. Evaluation of intrinsic disorder propensity of PLAU (UniProt ID: P00749):** (A) 1.75 Å resolution structure (olive color) of PLAU residues 156-431 (PDB ID: 1C5X). (B) Disorder profile generated by PONDR<sup>®</sup> VSL2 (grey line), PONDR<sup>®</sup> VL3 (red line), PONDR<sup>®</sup> VLXT (blue line), PONDR<sup>®</sup> FIT (magenta line), IUPRED long (purple line) and IUPRED short (orange line). The cyan line represents the mean disorder propensity calculated using the disorder scores from all six predictors. The light magenta shadow region represents the PONDR<sup>®</sup> FIT error distribution and the light cyan region represents the mean error distribution. The grey shaded area of the graph represents residues for which no structure is available. (No results for PLAU were found in D<sup>2</sup>P<sup>2</sup>). (C) STRING-generated PPI network using the highest confidence level of 0.9 includes 140 nodes connected by 5,552 edges, which significantly exceeds the number of edges (419) expected for a random set of proteins of similar size. This network is characterized by the average node degree of 79.3, an average clustering coefficient of 0.873, and PPI enrichment p-value < 10<sup>-16</sup>. Most common biological processes associated with the this network include regulated exocytosis, neutrophil mediated immunity, neutrophil degranulation, cell activation involved in immune response, and secretion by cell, and top 5 molecular functions are cell adhesion molecule binding, carbohydrate binding, integrin binding, signaling receptor activity, and signaling receptor binding.



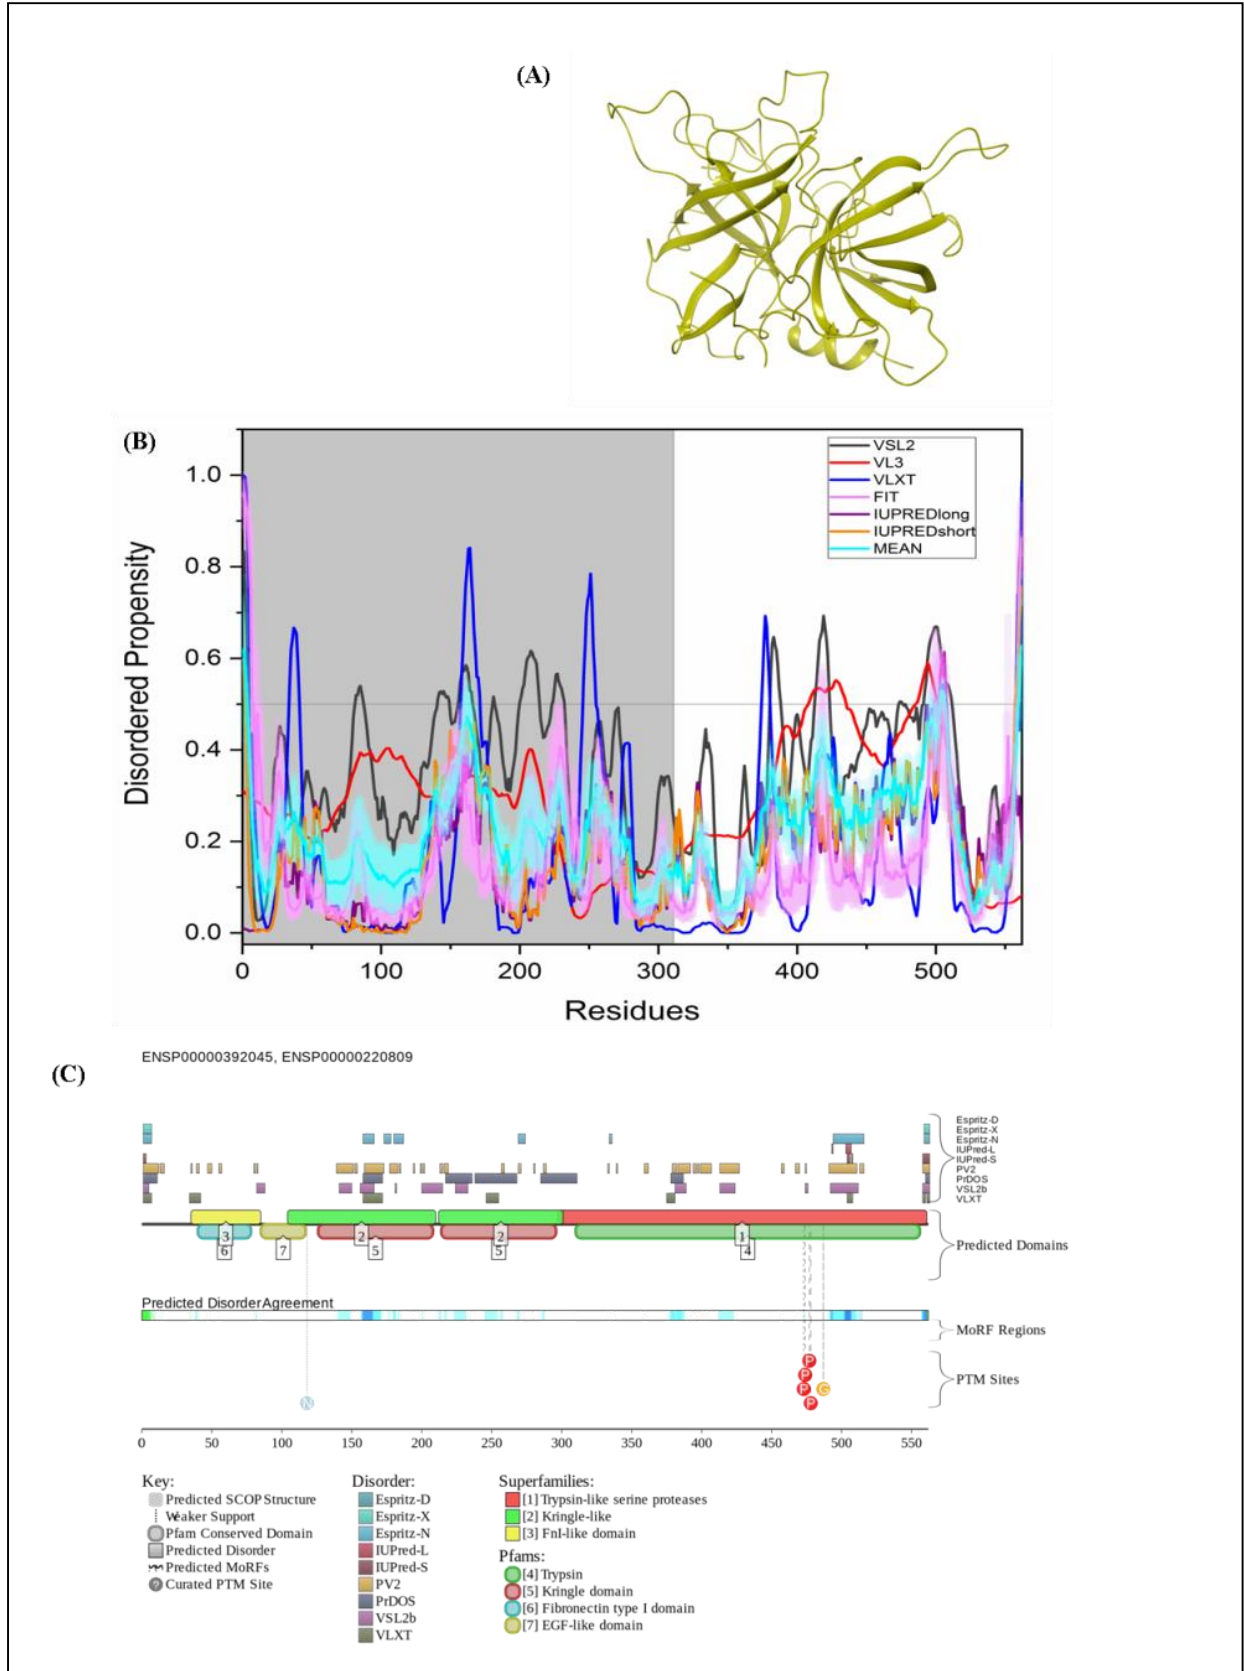

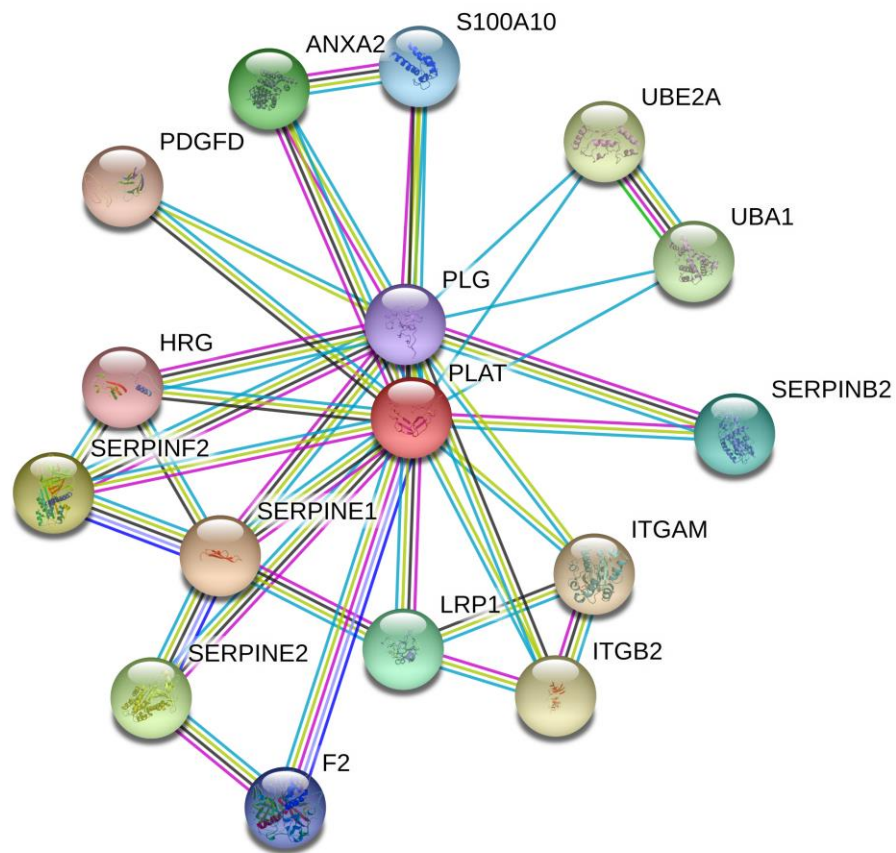

(D)

**Supplementary Figure S11. Evaluation of intrinsic disorder propensity of PLAT (UniProt ID: P00750):** (A) 2.90 Å resolution structure (olive color) of PLAT residues 311 – 562 (PDB ID: 1A5H). (B) Disorder profile generated by PONDR<sup>®</sup> VSL2 (grey line), PONDR<sup>®</sup> VL3 (red line), PONDR<sup>®</sup> VLXT (blue line), PONDR<sup>®</sup> FIT (magenta line), IUPRED long (purple line) and IUPRED short (orange line). The cyan line represents the mean disorder propensity calculated using the disorder scores from all six predictors. The light magenta shadow region represents the PONDR<sup>®</sup> FIT error distribution and the light cyan region represents the mean error distribution. The grey shaded area of the graph represents residues for which no structure is available. (C) Evaluation of MoRF sites and PTMs in PLAT by D<sup>2</sup>P<sup>2</sup>. (D) STRING-generated PPI network using the highest confidence level of 0.9 includes 16 nodes connected by 37 edges, which significantly exceeds the number of edges (17) expected for a random set of proteins of similar size. This network is characterized by the average node degree of 4.62, an average clustering coefficient of 0.813, and PPI enrichment p-value < 1.49×10<sup>-5</sup>. Most common biological processes associated with the this network include fibrinolysis, negative regulation of blood coagulation, regulation of response to external stimulus, negative regulation of fibrinolysis, and regulation of body fluid levels, and top 5 molecular functions are serine-type endopeptidase inhibitor activity, enzyme inhibitor activity, protease binding, enzyme regulator activity, and signaling receptor binding.

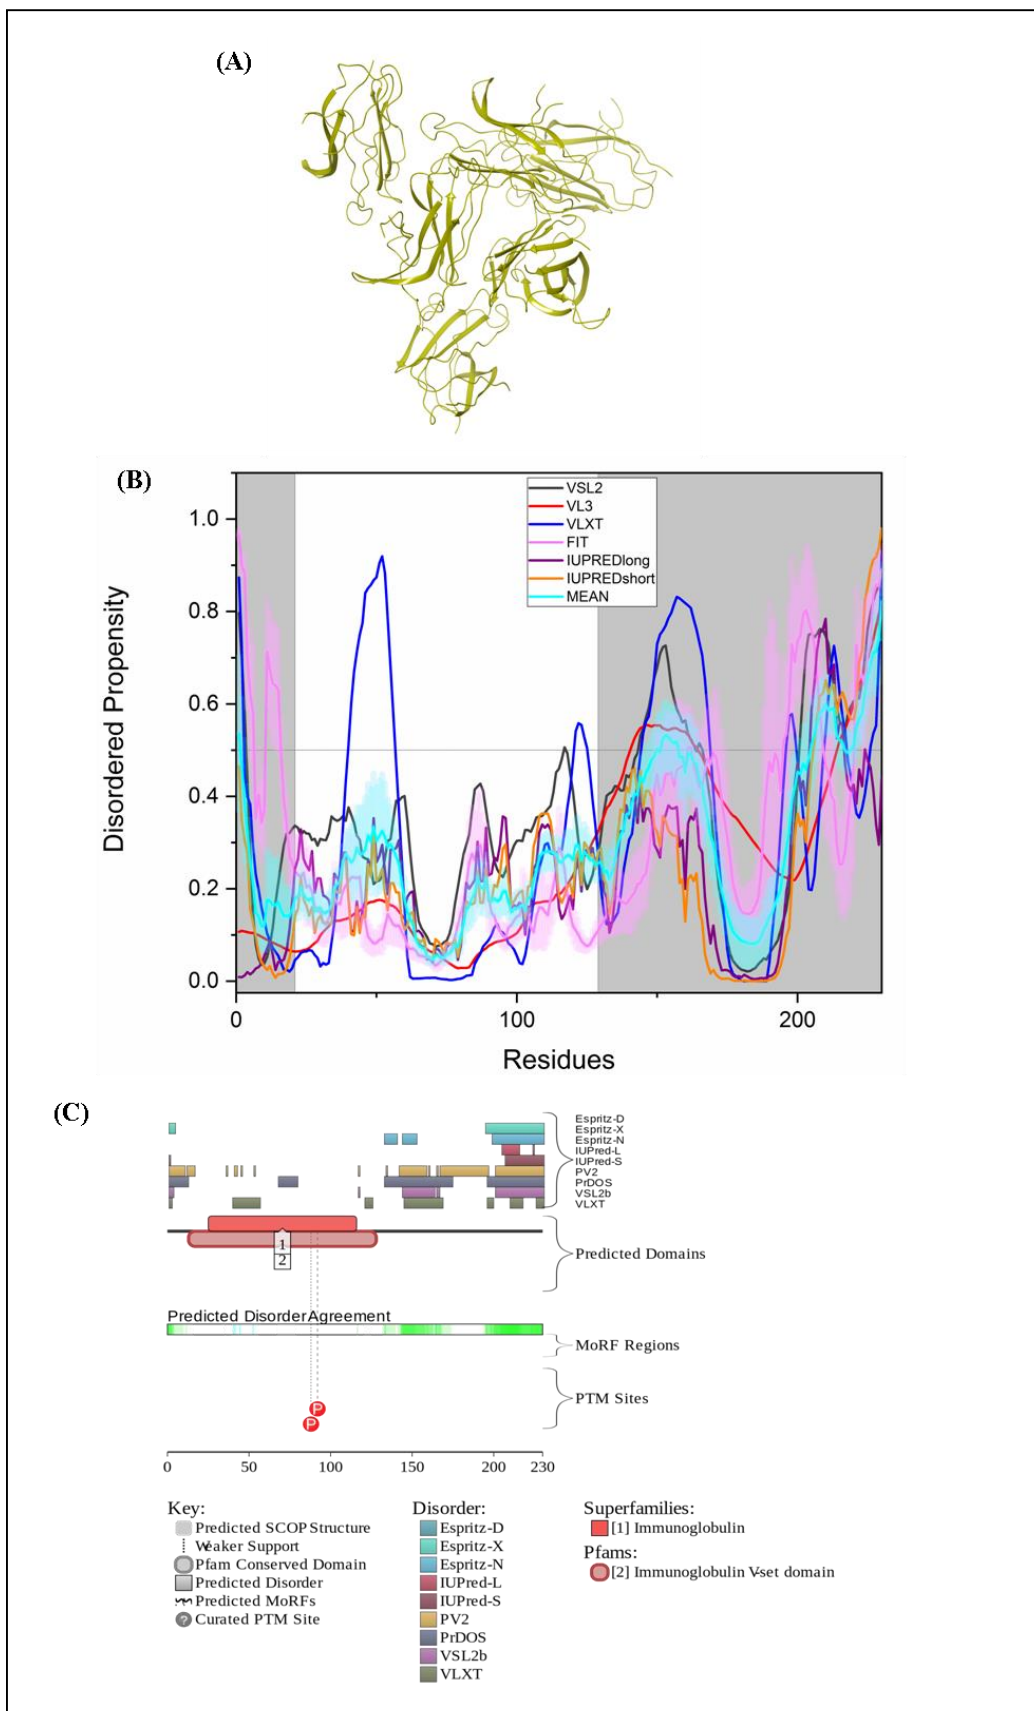



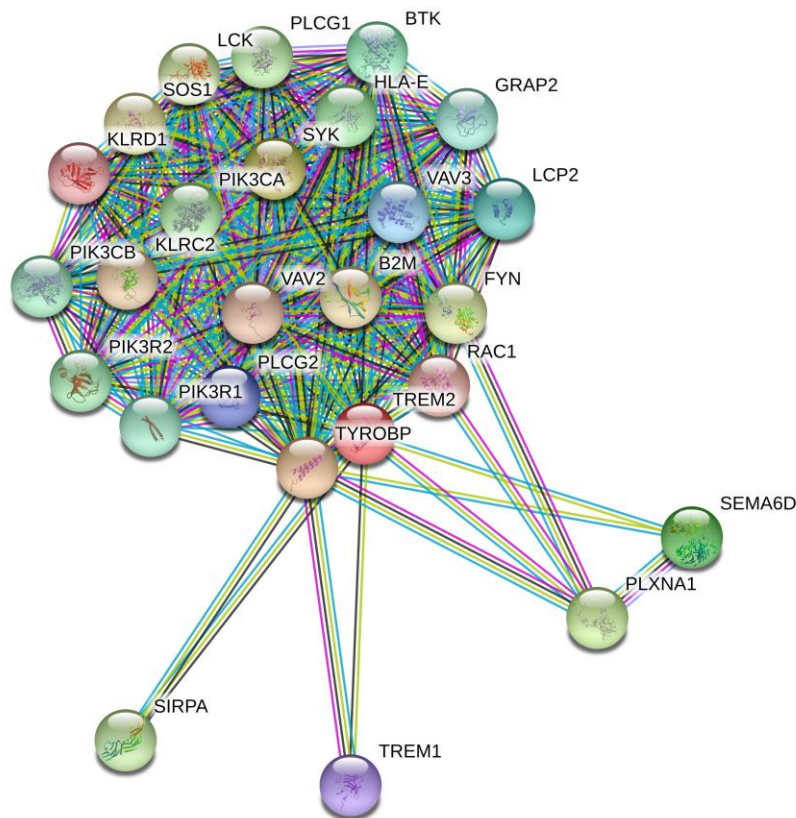

(D)

**Supplementary Figure S12. Evaluation of intrinsic disorder propensity of TREM2 (UniProt ID: P00750):** (A) 2.20 Å resolution structure (olive color) of TREM2 residues 19-174 (PDB ID: 6B8O). (B) Disorder profile generated by PONDR<sup>®</sup> VSL2 (grey line), PONDR<sup>®</sup> VL3 (red line), PONDR<sup>®</sup> VLXT (blue line), PONDR<sup>®</sup> FIT (magenta line), IUPRED long (purple line) and IUPRED short (orange line). The cyan line represents the mean disorder propensity calculated using the disorder scores from all six predictors. The light magenta shadow region represents the PONDR<sup>®</sup> FIT error distribution and the light cyan region represents the mean error distribution. The grey shaded area of the graph represents residues for which no structure is available. (C) Evaluation of MoRF sites and PTMs in TREM2 by D<sup>2</sup>P<sup>2</sup>. (D) STRING-generated PPI network using the highest confidence level of 0.9 includes 26 nodes connected by 242 edges, which significantly exceeds the number of edges (38) expected for a random set of proteins of similar size. This network is characterized by the average node degree of 18.6, an average clustering coefficient of 0.965, and PPI enrichment p-value < 1.49×10<sup>-5</sup>. Most common biological processes associated with the this network include Fc-epsilon receptor signaling pathway, regulation of immune response, Fc receptor signaling pathway, immune response-regulating cell surface receptor signaling pathway, and immune response-activating cell surface receptor signaling, and top 5 molecular functions are phosphotyrosine residue binding, phosphatidylinositol-4,5-bisphosphate 3-kinase activity, protein binding, signaling receptor binding, and non-membrane spanning protein tyrosine kinase activity.

**Supplementary Table 1. SLiMs associated with MoRF residues and their annotation.**

| Protein      | MoRF residues (D2P2) | SLiM Position | SLiM Sequence | Position w.r.t. MoRF | Type of ELM annotation                                                 | SLiM Description                                                                                                                                                                                                                     |
|--------------|----------------------|---------------|---------------|----------------------|------------------------------------------------------------------------|--------------------------------------------------------------------------------------------------------------------------------------------------------------------------------------------------------------------------------------|
| <b>BIN1</b>  | 67-72 (6)            | 335-337       | LRK           | Close proximity      | ELM_CLV                                                                | N-Arg dibasic convertase (NRD/Nardilysin) cleavage site (X- -R-K or R- -R-X).                                                                                                                                                        |
|              | 234-246 (13)         | 351-355       | KEVKQ         | Overlap              | ELM_CLV                                                                | Subtilisin/kexin isozyme-1 (SKI1) cleavage site ([RK]-X-[hydrophobic]-[LTKF]- -X).                                                                                                                                                   |
|              | 260-286 (27)         | 360-370       | SLFEDTFVPEI   | Embedded             | ELM_DEG                                                                | A destruction motif interacts with the COP1 WD 40 domain for target ubiquitination and degradation.                                                                                                                                  |
|              | 304-336 (33)         | 363-370       | EDTFVPEI      | Embedded             | ELM_DEG                                                                |                                                                                                                                                                                                                                      |
|              | 353-402 (50)         | 345-352       | PKHTPSKE      | Close proximity      | ELM_DEG                                                                | The TPxxE phospho-dependent degron binds the FBW7 F box proteins of the SCF (Skp1_Cullin-Fbox) complex.                                                                                                                              |
|              | 411-452 (42)         | 485-489       | AASSS         | Embedded             | ELM_DEG                                                                | The S/T rich motif known as the SPOP-binding consensus (SBC) of the MATH-BTB protein, SPOP, is present in substrates that undergo SPOP/Cul3-dependant ubiquitination.                                                                |
|              | 456-475 (20)         | 372-377       | VTPSQ         | Embedded             | ELM_DOC                                                                | Phospho-dependent motif that mediates docking of CDK substrates and regulators to cyclin-CDK-bound Cks1                                                                                                                              |
|              | 478-503 (26)         | 351-361       | KEVKQEQLSL    | Overlap              | ELM_DOC                                                                | MAPK interacting molecules (e.g. MAPKKs, substrates, phosphatases) carry docking motif that help to regulate specific interaction in the MAPK cascade. The classic motif approximates (R/K)xxxx#x# where # is a hydrophobic residue. |
|              | 513-528 (16)         | 542-550       | KAGDVVLVI     | Embedded             | ELM_DOC                                                                | A kinase docking motif that mediates interaction towards the ERK1/2 and p38 subfamilies of MAP kinases.                                                                                                                              |
| 541-552 (12) | 515-518              | LDLP          | Embedded      | ELM_DOC              | Docking motif in calcineurin substrates that binds at the interface of |                                                                                                                                                                                                                                      |

|  |         |         |          |         |         |                                                                                                                                                                                            |
|--|---------|---------|----------|---------|---------|--------------------------------------------------------------------------------------------------------------------------------------------------------------------------------------------|
|  |         |         |          |         |         | the catalytic CNA and regulatory CNB subunits.                                                                                                                                             |
|  | 307-313 | TPEIRVN | Embedded | ELM_DOC | ELM_DOC | Calcineurin substrate docking site, leads to the effective                                                                                                                                 |
|  | 367-373 | VPEISVT | Embedded | ELM_DOC |         | dephosphorylation of serine/threonine phosphorylation sites.                                                                                                                               |
|  | 283-287 | AQPSD   | Overlap  | ELM_DOC | ELM_DOC | The USP7 MATH domain binding motif variant based on the MDM2 and p53 interactions.                                                                                                         |
|  | 408-412 | PTPSG   | Overlap  |         |         |                                                                                                                                                                                            |
|  | 426-430 | PAGSL   | Embedded |         |         |                                                                                                                                                                                            |
|  | 459-463 | AEASE   | Embedded |         |         |                                                                                                                                                                                            |
|  | 485-489 | AASSS   | Embedded |         |         |                                                                                                                                                                                            |
|  | 486-490 | ASSSL   | Embedded |         |         |                                                                                                                                                                                            |
|  | 300-305 | PDGSPA  | Overlap  |         |         |                                                                                                                                                                                            |
|  | 304-309 | PAATPE  | Embedded | ELM_DOC | ELM_DOC | The Class IV WW domain interaction motif is recognised primarily by the Pin1 phosphorylation-dependent prolyl isomerase.                                                                   |
|  | 320-325 | GGATPG  | Embedded |         |         |                                                                                                                                                                                            |
|  | 328-333 | LPKSPS  | Embedded |         |         |                                                                                                                                                                                            |
|  | 371-376 | SVTTPS  | Embedded |         |         |                                                                                                                                                                                            |
|  | 400-405 | PVTSPV  | Overlap  |         |         |                                                                                                                                                                                            |
|  | 406-411 | KAPTPS  | Overlap  |         |         |                                                                                                                                                                                            |
|  | 422-427 | PTESPA  | Embedded |         |         |                                                                                                                                                                                            |
|  | 362-366 | FEDTF   | Embedded | ELM_LIG | ELM_LIG | FxDxF motif responsible for the binding of accessory endocytic proteins to the appendage of the alpha-subunit of adaptor protein complex AP-2                                              |
|  | 359-364 | FEDTF   | Embedded | ELM_LIG | ELM_LIG | Amphipathic motif that is involved in APC/C inhibition by binding of CDH1/CDC20. In metazoan cyclin A, the motif also acts as a degron, enabling the cyclin's degradation in prometaphase. |
|  | 275-279 | GSNTF   | Embedded | ELM_LIG | ELM_LIG | Phosphopeptide motif which directly interacts with the BRCT (carboxy-terminal) domain of the Breast Cancer Gene BRCA1 with low affinity                                                    |
|  | 390-394 | LLDLD   | Embedded | ELM_LIG | ELM_LIG | Clathrin box motif found on cargo adaptor proteins, it interacts with the beta propeller structure located at the N-terminus of Clathrin heavy chain.                                      |



|  |         |            |                 |         |                                                                                                                                                                                                                                                           |
|--|---------|------------|-----------------|---------|-----------------------------------------------------------------------------------------------------------------------------------------------------------------------------------------------------------------------------------------------------------|
|  | 415-420 | IPWDLW     | Embedded        | ELM_LIG | Clathrin box motif found on cargo adaptor proteins, it mediates binding to the N-terminal beta propeller of clathrin heavy chain. Also called W box, it is found in the central region of Amphiphysins where it coexists with a "classical" clathrin box. |
|  | 276-282 | SNTFTVK    | Embedded        | ELM_LIG | Phosphothreonine motif binding a subset of FHA domains that show a preference for a large aliphatic amino acid at the pT+3 position.                                                                                                                      |
|  | 305-311 | AATPEIR    | Embedded        |         |                                                                                                                                                                                                                                                           |
|  | 400-406 | PVTSPVK    | Overlap         |         |                                                                                                                                                                                                                                                           |
|  | 439-445 | EGTFAVS    | Embedded        |         |                                                                                                                                                                                                                                                           |
|  | 534-540 | TDTDELQ    | Close proximity |         |                                                                                                                                                                                                                                                           |
|  | 415-422 | IPWDLWEP   | Embedded        | ELM_LIG | This short WD or WE motif is found in cargo proteins and mediates kinesin-1-dependent microtubule transport by binding to the KLC TPR region.                                                                                                             |
|  | 392-398 | DLDFDPL    | Embedded        | ELM_LIG | Canonical LIR motif that binds to Atg8 protein family members to mediate processes involved in autophagy.                                                                                                                                                 |
|  | 394-398 | DFDPL      | Embedded        |         |                                                                                                                                                                                                                                                           |
|  | 362-366 | FEDTF      | Embedded        | ELM_LIG | Fxxx[WF] motifs are present in Pex19 and <i>S. cerevisiae</i> Pex5 cytosolic receptors that bind to peroxisomal membrane docking member, Pex14                                                                                                            |
|  | 442-446 | FAVSW      | Embedded        |         |                                                                                                                                                                                                                                                           |
|  | 336-342 | RKGPPVP    | Overlap         | ELM_LIG | This is the motif recognized by class I SH3 domains                                                                                                                                                                                                       |
|  | 337-343 | KGPPVPP    | Close proximity |         |                                                                                                                                                                                                                                                           |
|  | 326-332 | ATLPKSP    | Embedded        | ELM_LIG | This is the motif recognized by those SH3 domains with a non-canonical class I recognition specificity                                                                                                                                                    |
|  | 336-342 | RKGPPVP    | Overlap         |         |                                                                                                                                                                                                                                                           |
|  | 337-343 | KGPPVPP    | Close proximity |         |                                                                                                                                                                                                                                                           |
|  | 338-344 | GPPVPPP    | Close proximity |         |                                                                                                                                                                                                                                                           |
|  | 369-375 | EISVTTP    | Embedded        |         |                                                                                                                                                                                                                                                           |
|  | 394-400 | DFDPLPP    | Embedded        |         |                                                                                                                                                                                                                                                           |
|  | 398-404 | LPPVTSP    | Overlap         |         |                                                                                                                                                                                                                                                           |
|  | 402-408 | TSPVKAP    | Overlap         |         |                                                                                                                                                                                                                                                           |
|  | 441-447 | TFAVSWP    | Embedded        |         |                                                                                                                                                                                                                                                           |
|  | 452-458 | EPGPAQP    | Overlap         |         |                                                                                                                                                                                                                                                           |
|  | 356-365 | EQILSLFEDT | Embedded        |         |                                                                                                                                                                                                                                                           |

|  |         |           |                 |         |                                                                                                                                                                                                                         |
|--|---------|-----------|-----------------|---------|-------------------------------------------------------------------------------------------------------------------------------------------------------------------------------------------------------------------------|
|  | 357-365 | QILSLFEDT | Embedded        |         | Motif for the parallel beta augmentation mode of non-covalent binding to SUMO protein.                                                                                                                                  |
|  | 389-394 | SLLDLD    | Embedded        |         |                                                                                                                                                                                                                         |
|  | 456-464 | AQPAEASEV | Embedded        | ELM_LIG | TRAF6 binding site. Members of the tumor necrosis factor receptor (TNFR) superfamily initiate intracellular signaling by recruiting the C-domain of the TNFR-associated factors (TRAFs) through their cytoplasmic tails |
|  | 553-561 | QNPPEQDEG | Close proximity |         |                                                                                                                                                                                                                         |
|  | 345-351 | PKHTPSK   | Close proximity | ELM_MOD | Canonical version of the CDK phosphorylation site which shows specificity towards a lysine/arginine residue at the [ST]+3 position.                                                                                     |
|  | 400-406 | PVTSPVK   | Overlap         |         |                                                                                                                                                                                                                         |
|  | 304-311 | PAATPEIR  | Embedded        | ELM_MOD | Longer version of the CDK phosphorylation site which shows specificity towards a lysine/arginine residue at position +4 after the phospho-Ser/Thr                                                                       |
|  | 371-377 | SVTTPSQ   | Embedded        | ELM_MOD | CK1 phosphorylation site                                                                                                                                                                                                |
|  | 411-417 | SGQSIPW   | Embedded        |         |                                                                                                                                                                                                                         |
|  | 429-435 | SLPSGEP   | Embedded        |         |                                                                                                                                                                                                                         |
|  | 445-451 | SWPSQTA   | Embedded        |         |                                                                                                                                                                                                                         |
|  | 357-363 | QILSLFE   | Embedded        | ELM_MOD | CK2 phosphorylation site                                                                                                                                                                                                |
|  | 373-379 | TTPSQFE   | Embedded        |         |                                                                                                                                                                                                                         |
|  | 433-439 | GEPSAAE   | Embedded        |         |                                                                                                                                                                                                                         |
|  | 417-420 | WDLW      | Embedded        | ELM_MOD | Motif for attachment of a mannosyl residue to a tryptophan                                                                                                                                                              |
|  | 410-413 | PSGQ      | Overlap         | ELM_MOD | Glycosaminoglycan attachment site                                                                                                                                                                                       |
|  | 431-434 | PSGE      | Embedded        |         |                                                                                                                                                                                                                         |
|  | 434-438 | EPSAA     | Embedded        |         |                                                                                                                                                                                                                         |
|  | 435-438 | PSAA      | Embedded        |         |                                                                                                                                                                                                                         |
|  | 509-512 | GSGA      | Close proximity |         |                                                                                                                                                                                                                         |
|  | 273-280 | QHGSNTFT  | Embedded        | ELM_MOD | GSK3 phosphorylation recognition site                                                                                                                                                                                   |
|  | 300-307 | PDGSPAAT  | Overlap         |         |                                                                                                                                                                                                                         |
|  | 320-327 | GGATPGAT  | Embedded        |         |                                                                                                                                                                                                                         |
|  | 324-331 | PGATLPKS  | Embedded        |         |                                                                                                                                                                                                                         |
|  | 382-389 | GPFSEQAS  | Embedded        |         |                                                                                                                                                                                                                         |
|  | 422-429 | PTESPAGS  | Embedded        |         |                                                                                                                                                                                                                         |

|  |         |          |                 |         |                                                                                                                                                                                                                                                 |
|--|---------|----------|-----------------|---------|-------------------------------------------------------------------------------------------------------------------------------------------------------------------------------------------------------------------------------------------------|
|  | 429-436 | SLPSGEP  | Embedded        |         |                                                                                                                                                                                                                                                 |
|  | 438-445 | AEGTFAVS | Embedded        |         |                                                                                                                                                                                                                                                 |
|  | 480-487 | TAASEAAS | Embedded        |         |                                                                                                                                                                                                                                                 |
|  | 494-501 | VVETFPAT | Embedded        |         |                                                                                                                                                                                                                                                 |
|  | 498-505 | FPATVNGT | Overlap         |         |                                                                                                                                                                                                                                                 |
|  | 529-536 | HDYTATDT | Close proximity |         |                                                                                                                                                                                                                                                 |
|  | 502-507 | VNGTVE   | Overlap         | ELM_MOD | Generic motif for N-glycosylation. It was shown that Trp, Asp, and Glu are uncommon before the Ser/Thr position. Efficient glycosylation usually occurs when ~60 residues or more separate the glycosylation acceptor site from the C-terminus. |
|  | 362-367 | FEDTFV   | Embedded        |         |                                                                                                                                                                                                                                                 |
|  | 442-447 | FAVSWP   | Embedded        | ELM_MOD | NEK2 phosphorylation motif with preferred Phe, Leu or Met in the -3 position to compensate for less favorable residues in the +1 and +2 position.                                                                                               |
|  | 330-336 | KSPSQLR  | Embedded        |         |                                                                                                                                                                                                                                                 |
|  | 373-379 | TTPSQFE  | Embedded        |         |                                                                                                                                                                                                                                                 |
|  | 445-451 | SWPSQTA  | Embedded        | ELM_MOD | (ST)Q motif which is phosphorylated by PIKK family members.                                                                                                                                                                                     |
|  | 465-471 | AGGTQPA  | Embedded        |         |                                                                                                                                                                                                                                                 |
|  | 362-368 | FEDTFVP  | Embedded        |         |                                                                                                                                                                                                                                                 |
|  | 368-374 | PEISVTT  | Embedded        | ELM_MOD | Ser/Thr residue phosphorylated by the Plk1 kinase                                                                                                                                                                                               |
|  | 386-392 | EQASLLD  | Embedded        | ELM_MOD | Ser/Thr residue phosphorylated by Plk2 and Plk3                                                                                                                                                                                                 |
|  | 357-363 | QILSLFE  | Embedded        |         |                                                                                                                                                                                                                                                 |
|  | 362-368 | FEDTFVP  | Embedded        | ELM_MOD | Ser/Thr residue phosphorylated by Plk4                                                                                                                                                                                                          |
|  | 386-392 | EQASLLD  | Embedded        |         |                                                                                                                                                                                                                                                 |
|  | 300-306 | PDGSPAA  | Overlap         |         |                                                                                                                                                                                                                                                 |
|  | 304-310 | PAATPEI  | Embedded        |         |                                                                                                                                                                                                                                                 |
|  | 320-326 | GGATPGA  | Embedded        |         |                                                                                                                                                                                                                                                 |
|  | 328-334 | LPKSPSQ  | Embedded        |         |                                                                                                                                                                                                                                                 |
|  | 345-351 | PKHTPSK  | Close proximity | ELM_MOD | Proline-Directed Kinase (e.g. MAPK) phosphorylation site in higher eukaryotes                                                                                                                                                                   |
|  | 371-377 | SVTTPSQ  | Embedded        |         |                                                                                                                                                                                                                                                 |
|  | 400-406 | PVTSPVK  | Overlap         |         |                                                                                                                                                                                                                                                 |
|  | 406-412 | KAPTPSG  | Overlap         |         |                                                                                                                                                                                                                                                 |
|  | 422-428 | PTESPAG  | Embedded        |         |                                                                                                                                                                                                                                                 |



|              |                 |         |           |                 |         |                                                                                                                                                                                                                                                                  |
|--------------|-----------------|---------|-----------|-----------------|---------|------------------------------------------------------------------------------------------------------------------------------------------------------------------------------------------------------------------------------------------------------------------|
|              |                 | 353-356 | VKQE      | Embedded        | ELM_MOD | Motif recognised for modification by SUMO-1                                                                                                                                                                                                                      |
|              |                 | 386-391 | EQASLL    | Embedded        | ELM_TRG | Sorting and internalisation signal found in the cytoplasmic juxta-membrane region of type I transmembrane proteins. Targets them from the Trans Golgi Network to the lysosomal-endosomal-melanosomal compartments. Interacts with adaptor protein (AP) complexes |
| <b>APOE4</b> | 278-283<br>(6)  | 279-285 | LKSWFEP   | Overlap         | ELM_DOC | docking site required for the regulatory subunit B56 of PP2A for protein dephosphorylation.                                                                                                                                                                      |
|              |                 | 278-283 | RLKSWF    | Embedded        | ELM_LIG | Canonical Arg-containing phospho-motif mediating a strong interaction with 14-3-3 proteins.                                                                                                                                                                      |
|              |                 | 278-286 | RLKSWFEPL | Overlap         | ELM_LIG | A motif present in the BRCA2 protein which binds to the WD 40 repeat (blade 4,5) domain of PALB2 which is required for the recognition of DNA double strand breaks and repair.                                                                                   |
|              |                 | 281-286 | SWFEPL    | Overlap         | ELM_LIG | Canonical LIR motif that binds to Atg8 protein family members to mediate processes involved in autophagy.                                                                                                                                                        |
|              |                 | 278-284 | RLKSWFE   | Overlap         | ELM_MOD | CK2 phosphorylation site                                                                                                                                                                                                                                         |
|              |                 | 278-284 | RLKSWFE   | Overlap         | ELM_MOD | Ser/Thr residue phosphorylated by Plk4                                                                                                                                                                                                                           |
| <b>APP</b>   | 181-190<br>(10) | 191-195 | EESDN     | Close proximity | ELM_CLV | Caspase-3 and Caspase-7 cleavage site.                                                                                                                                                                                                                           |
|              | 205-243<br>(39) | 216-220 | DYADG     | Embedded        |         |                                                                                                                                                                                                                                                                  |
|              | 251-275<br>(25) | 285-289 | EVVRE     | Embedded        | ELM_CLV | Separase cleavage site, best known in sister chromatid separation.                                                                                                                                                                                               |
|              | 283-291<br>(9)  | 273-277 | ATTTT     | Embedded        | ELM_DEG | The S/T rich motif known as the SPOP-binding consensus (SBC) of the MATH-BTB protein, SPOP, is present in substrates that undergo SPOP/Cul3-dependant ubiquitination.                                                                                            |
|              | 301-322<br>(22) | 218-222 | ADGSE     | Embedded        | ELM_DOC | The USP7 MATH domain binding motif variant                                                                                                                                                                                                                       |

|              |         |               |                 |         |  |                                                                                                                                                                                                                                           |
|--------------|---------|---------------|-----------------|---------|--|-------------------------------------------------------------------------------------------------------------------------------------------------------------------------------------------------------------------------------------------|
|              |         |               |                 |         |  | based on the MDM2 and p53 interactions.                                                                                                                                                                                                   |
| 336-346 (11) | 267-273 | ERTTSSIA      | Embedded        | ELM_LIG |  | Phosphothreonine motif binding a subset of FHA domains that show a preference for a large aliphatic amino acid at the pT+3 position.                                                                                                      |
| 391-396 (6)  | 278-284 | TTTESVE       | Close proximity |         |  |                                                                                                                                                                                                                                           |
| 426-437 (12) | 601-607 | KTTVELL       | Overlap         |         |  |                                                                                                                                                                                                                                           |
| 471-479 (9)  | 276-282 | TTTTTES       | Close proximity | ELM_LIG |  | Phosphothreonine motif binding a subset of FHA domains that have a preference for an acidic amino acid at the pT+3 position.                                                                                                              |
| 491-497 (7)  | 600-606 | TKTTVEL       | Overlap         |         |  |                                                                                                                                                                                                                                           |
| 545-550 (6)  | 217-220 | YADG          | Embedded        | ELM_LIG |  | Src-family Src Homology 2 (SH2) domains binding motif.                                                                                                                                                                                    |
| 606-626 (21) | 262-265 | YEEA          | Embedded        |         |  |                                                                                                                                                                                                                                           |
|              | 602-608 | TTVELLP       | Overlap         | ELM_LIG |  | Motif for the antiparallel beta augmentation mode of non-covalent binding to SUMO protein.                                                                                                                                                |
|              | 603-608 | TVELLP        | Overlap         |         |  |                                                                                                                                                                                                                                           |
|              | 221-233 | SEDKVVEVAEEEE | Embedded        | ELM_LIG |  | Motif for the parallel beta augmentation mode of non-covalent binding to SUMO protein.                                                                                                                                                    |
|              | 222-233 | EDKVVEVAEEEE  | Embedded        |         |  |                                                                                                                                                                                                                                           |
|              | 223-233 | DKVVEVAEEEE   | Embedded        |         |  |                                                                                                                                                                                                                                           |
|              | 224-233 | KVVEVAEEEE    | Embedded        |         |  |                                                                                                                                                                                                                                           |
|              | 229-232 | AEEE          | Embedded        | ELM_LIG |  | Major TRAF2-binding consensus motif. Members of the tumor necrosis factor receptor (TNFR) superfamily initiate intracellular signaling by recruiting the C-domain of the TNFR-associated factors (TRAFs) through their cytoplasmic tails. |
|              | 261-264 | PYEE          | Embedded        |         |  |                                                                                                                                                                                                                                           |
|              | 282-285 | SVEE          | Overlap         |         |  |                                                                                                                                                                                                                                           |
|              | 271-277 | SIATTTT       | Overlap         | ELM_MOD |  | CK1 phosphorylation site                                                                                                                                                                                                                  |
|              | 343-349 | SAMSQSL       | Overlap         |         |  |                                                                                                                                                                                                                                           |
|              | 275-281 | TTTTTTE       | Overlap         | ELM_MOD |  | CK2 phosphorylation site                                                                                                                                                                                                                  |
|              | 279-285 | TTESVEE       | Overlap         |         |  |                                                                                                                                                                                                                                           |
|              | 349-355 | LLKTTQE       | Close proximity |         |  |                                                                                                                                                                                                                                           |
|              | 599-605 | ETKTTVE       | Close proximity | ELM_MOD |  | Glycosaminoglycan attachment site                                                                                                                                                                                                         |
|              | 342-345 | GSAM          | Embedded        |         |  |                                                                                                                                                                                                                                           |
|              | 263-270 | EEATERTT      | Embedded        | ELM_MOD |  | GSK3 phosphorylation recognition site                                                                                                                                                                                                     |
|              | 267-274 | ERTTSSIA      | Embedded        |         |  |                                                                                                                                                                                                                                           |
|              | 268-275 | RTTSSIA       | Embedded        |         |  |                                                                                                                                                                                                                                           |
|              | 271-278 | SIATTTT       | Overlap         |         |  |                                                                                                                                                                                                                                           |

|               |              |         |              |                 |         |                                                                                                                                                                       |
|---------------|--------------|---------|--------------|-----------------|---------|-----------------------------------------------------------------------------------------------------------------------------------------------------------------------|
|               |              | 272-279 | IATTTTTT     | Overlap         |         |                                                                                                                                                                       |
|               |              | 273-280 | ATTTTTTT     | Overlap         |         |                                                                                                                                                                       |
|               |              | 275-282 | TTTTTTES     | Overlap         |         |                                                                                                                                                                       |
|               |              | 345-352 | MSQSLLKT     | Overlap         |         |                                                                                                                                                                       |
|               |              | 345-350 | MSQSLL       | Overlap         |         |                                                                                                                                                                       |
|               |              | 349-354 | LLKTTQ       | Close proximity | ELM_MOD | NEK2 phosphorylation motif with preferred Phe, Leu or Met in the -3 position to compensate for less favorable residues in the +1 and +2 position.                     |
|               |              | 343-349 | SAMSQSL      | Overlap         | ELM_MOD | (ST)Q motif which is phosphorylated by PIKK family members.                                                                                                           |
|               |              | 611-617 | GEFSLDD      | Embedded        | ELM_MOD | Ser/Thr residue phosphorylated by the Plk1 kinase                                                                                                                     |
|               |              | 345-351 | MSQSLLK      | Overlap         | ELM_MOD | Ser/Thr residue phosphorylated by Plk4                                                                                                                                |
|               |              | 216-226 | DYADGSEDKVV  | Embedded        |         |                                                                                                                                                                       |
|               |              | 219-226 | DGSEDKVV     | Embedded        |         |                                                                                                                                                                       |
|               |              | 221-226 | SEDKVV       | Embedded        | ELM_MOD | Inverted version of SUMOylation motif recognized for modification by SUMO-1                                                                                           |
|               |              | 310-317 | DVTEGKCA     | Embedded        |         |                                                                                                                                                                       |
|               |              | 596-603 | SLTETKTT     | Close proximity |         |                                                                                                                                                                       |
|               |              | 605-617 | ELLPVNGEFLDD | Overlap         | ELM_TRG | Some proteins re-exported from the nucleus contain a Leucine-rich nuclear export signal (NES) binding to the CRM1 exportin protein.                                   |
| <b>PICALM</b> | 308-314 (7)  | 538-542 | DDLDS        | Overlap         | ELM_CLV | Caspase-3 and Caspase-7 cleavage site.                                                                                                                                |
|               | 335-344 (10) | 376-383 | IFSTPSSS     | Overlap         | ELM_DEG | The TPxxS phospho-dependent degron binds the FBW7 F box proteins of the SCF (Skp1_Cullin-Fbox) complex.                                                               |
|               | 366-378 (13) | 360-364 | PVSTS        | Close proximity | ELM_DEG | The S/T rich motif known as the SPOP-binding consensus (SBC) of the MATH-BTB protein, SPOP, is present in substrates that undergo SPOP/Cul3-dependant ubiquitination. |
|               | 392-397 (6)  | 377-382 | FSTPSS       | Overlap         | ELM_DOC | Phospho-dependent motif that mediates docking of CDK substrates and regulators to cyclin-CDK-bound Cks1.                                                              |
|               | 506-514 (9)  | 371-377 | APAIDIF      | Embedded        | ELM_DOC | Calcineurin substrate docking site, leads to the                                                                                                                      |



|              |         |          |                 |         |  |                                                                                                                                         |
|--------------|---------|----------|-----------------|---------|--|-----------------------------------------------------------------------------------------------------------------------------------------|
|              |         |          |                 |         |  | effective dephosphorylation of serine/threonine phosphorylation sites.                                                                  |
| 540-553 (14) | 305-309 | AVSSL    | Embedded        | ELM_DOC |  | The USP7 MATH domain binding motif variant based on the MDM2 and p53 interactions.                                                      |
|              | 380-384 | PSSSN    | Close proximity |         |  |                                                                                                                                         |
|              | 376-381 | IFSTPS   | Overlap         | ELM_DOC |  | The Class IV WW domain interaction motif is recognised primarily by the Pin1 phosphorylation-dependent prolyl isomerase.                |
|              | 503-507 | DSGGF    | Overlap         | ELM_LIG |  | Phosphopeptide motif which directly interacts with the BRCT (carboxy-terminal) domain of the Breast Cancer Gene BRCA1 with low affinity |
|              | 384-390 | NSTSKLP  | Close proximity | ELM_LIG |  | Phosphothreonine motif binding a subset of FHA domains that show a preference for a large aliphatic amino acid at the pT+3 position.    |
|              | 504-510 | SGGFDEL  | Overlap         | ELM_LIG |  | Canonical LIR motif that binds to Atg8 protein family members to mediate processes involved in autophagy.                               |
|              | 509-515 | ELGGLLK  | Embedded        | ELM_LIG |  | The nuclear receptor box motif (LXXLL) confers binding to nuclear receptors.                                                            |
|              | 308-314 | SLASTGL  | Embedded        | ELM_MOD |  | CK1 phosphorylation site                                                                                                                |
|              | 359-365 | SPVSTSA  | Close proximity |         |  |                                                                                                                                         |
|              | 378-384 | STPSSSN  | Overlap         |         |  |                                                                                                                                         |
|              | 363-366 | TSAG     | Overlap         | ELM_MOD |  | Glycosaminoglycan attachment site                                                                                                       |
|              | 503-506 | DSGG     | Overlap         |         |  |                                                                                                                                         |
|              | 300-307 | TTLSNAVS | Close proximity | ELM_MOD |  | GSK3 phosphorylation recognition site                                                                                                   |
|              | 304-311 | NAVSSLAS | Overlap         |         |  |                                                                                                                                         |
|              | 305-312 | AVSSLAST | Overlap         |         |  |                                                                                                                                         |
|              | 308-315 | SLASTGLS | Overlap         |         |  |                                                                                                                                         |
|              | 375-382 | DIFSTPSS | Overlap         |         |  |                                                                                                                                         |
|              | 376-383 | IFSTPSSS | Overlap         |         |  |                                                                                                                                         |
|              | 378-385 | STPSSSNS | Overlap         |         |  |                                                                                                                                         |
|              | 379-386 | TPSSSNST | Close proximity |         |  |                                                                                                                                         |

|              |              |         |          |                 |         |                                                                                                                                                                                                                                                                  |
|--------------|--------------|---------|----------|-----------------|---------|------------------------------------------------------------------------------------------------------------------------------------------------------------------------------------------------------------------------------------------------------------------|
|              |              | 380-387 | PSSSNSTS | Close proximity |         |                                                                                                                                                                                                                                                                  |
|              |              | 397-404 | QQPTFHPS | Overlap         |         |                                                                                                                                                                                                                                                                  |
|              |              | 554-559 | GNGTTK   | Close proximity | ELM_MOD | Generic motif for N-glycosylation. It was shown that Trp, Asp, and Glu are uncommon before the Ser/Thr position. Efficient glycosylation usually occurs when ~60 residues or more separate the glycosylation acceptor site from the C-terminus.                  |
|              |              | 309-314 | LASTGL   | Embedded        | ELM_MOD | NEK2 phosphorylation motif with preferred Phe, Leu or Met in the -3 position to compensate for less favorable residues in the +1 and +2 position.                                                                                                                |
|              |              | 540-545 | LDSSLA   | Embedded        |         |                                                                                                                                                                                                                                                                  |
|              |              | 540-546 | LDSSLAN  | Embedded        | ELM_MOD | Ser/Thr residue phosphorylated by the Plk1 kinase                                                                                                                                                                                                                |
|              |              | 376-382 | IFSTPSS  | Overlap         | ELM_MOD | Proline-Directed Kinase (e.g. MAPK) phosphorylation site in higher eukaryotes.                                                                                                                                                                                   |
|              |              | 509-514 | ELGGLL   | Embedded        | ELM_TRG | Sorting and internalisation signal found in the cytoplasmic juxta-membrane region of type I transmembrane proteins. Targets them from the Trans Golgi Network to the lysosomal-endosomal-melanosomal compartments. Interacts with adaptor protein (AP) complexes |
| <b>CD33</b>  | 334-348 (15) | 341-345 | ASLNF    | Embedded        | ELM_LIG | Phosphopeptide motif which directly interacts with the BRCT (carboxy-terminal) domain of the Breast Cancer Gene BRCA1 with low affinity                                                                                                                          |
|              |              | 348-355 | MNPSKDTS | Overlap         | ELM_MOD | GSK3 phosphorylation recognition site                                                                                                                                                                                                                            |
|              |              | 340-343 | YASL     | Embedded        | ELM_TRG | Tyrosine-based sorting signal responsible for the interaction with mu subunit of AP (Adaptor Protein) complex                                                                                                                                                    |
| <b>PSEN1</b> | 1-26 (26)    | 28-32   | SQNDN    | Close proximity | ELM_CLV | Caspase-3 and Caspase-7 cleavage site.                                                                                                                                                                                                                           |
|              |              | 4_7     | LPAP     | Embedded        | ELM_DOC | docking motif in calcineurin substrates that                                                                                                                                                                                                                     |

|               |                 |         |         |          |         |                                                                                                                                                                       |
|---------------|-----------------|---------|---------|----------|---------|-----------------------------------------------------------------------------------------------------------------------------------------------------------------------|
|               |                 |         |         |          |         | binds at the interface of the catalytic CNA and regulatory CNB subunits.                                                                                              |
|               |                 | 14-18   | AQMSE   | Embedded | ELM_DOC | The USP7 MATH domain binding motif variant based on the MDM2 and p53 interactions.                                                                                    |
|               |                 | 22-27   | LSNTVR  | Overlap  | ELM_MOD | NEK2 phosphorylation motif with preferred Phe, Leu or Met in the -3 position to compensate for less favorable residues in the +1 and +2 position.                     |
|               |                 | 25-31   | TVRSQND | Overlap  | ELM_MOD | (ST)Q motif which is phosphorylated by PIKK family members.                                                                                                           |
|               |                 | 6_12    | APLSYFQ | Embedded | ELM_MOD | Ser/Thr residue phosphorylated by Plk4                                                                                                                                |
| <b>ADAM17</b> | 225-236<br>(12) | 783-787 | PNSST   | Embedded | ELM_DEG | The S/T rich motif known as the SPOP-binding consensus (SBC) of the MATH-BTB protein, SPOP, is present in substrates that undergo SPOP/Cul3-dependant ubiquitination. |
|               | 433-439<br>(7)  | 759-764 | MDTIQE  | Overlap  | ELM_DOC | docking site required for the regulatory subunit B56 of PP2A for protein dephosphorylation.                                                                           |
|               | 745-761<br>(17) | 783-787 | PNSST   | Embedded | ELM_DOC | The USP7 MATH domain binding motif variant based on the MDM2 and p53 interactions.                                                                                    |
|               | 774-815<br>(42) | 788-792 | AAKSF   | Embedded |         |                                                                                                                                                                       |
|               |                 | 780-782 | DPF     | Embedded | ELM_LIG | DPF/W motif binds alpha and beta subunits of AP2 adaptor complex.                                                                                                     |
|               |                 | 759-765 | MDTIQED | Overlap  | ELM_LIG | Phosphothreonine motif binding a subset of FHA domains that have a preference for an acidic amino acid at the pT+3 position.                                          |
|               |                 | 799-805 | PVTRSEK | Embedded |         |                                                                                                                                                                       |
|               |                 | 791-795 | SFEDL   | Embedded | ELM_LIG | Canonical LIR motif that binds to Atg8 protein family members to mediate processes involved in autophagy.                                                             |
|               |                 | 745-750 | IPSAPA  | Embedded | ELM_LIG | PTAP motif binds the N-terminal UEV domain of Tsg101.                                                                                                                 |
|               |                 | 433-436 | YVMY    | Embedded | ELM_LIG | STAT5 Src Homology 2 (SH2) domain binding motif.                                                                                                                      |
|               | 740-746         | QPAPVIP | Overlap | ELM_LIG  |         |                                                                                                                                                                       |



|                  |   |         |          |                 |         |                                                                                                                                                                                                                                                 |
|------------------|---|---------|----------|-----------------|---------|-------------------------------------------------------------------------------------------------------------------------------------------------------------------------------------------------------------------------------------------------|
|                  |   | 743-749 | PVIPSAP  | Overlap         |         | This is the motif recognized by those SH3 domains with a non-canonical class I recognition specificity                                                                                                                                          |
|                  |   | 746-752 | PSAPAAP  | Embedded        |         |                                                                                                                                                                                                                                                 |
|                  |   | 436-441 | YPIAVS   | Overlap         | ELM_LIG | Motif for the parallel beta augmentation mode of non-covalent binding to SUMO protein.                                                                                                                                                          |
|                  |   | 761-764 | TIQE     | Overlap         | ELM_LIG | Major TRAF2-binding consensus motif. Members of the tumor necrosis factor receptor (TNFR) superfamily initiate intracellular signaling by recruiting the C-domain of the TNFR-associated factors (TRAFs) through their cytoplasmic tails.       |
|                  |   | 767-773 | STDSHMD  | Close proximity | ELM_MOD | CK1 phosphorylation site                                                                                                                                                                                                                        |
|                  |   | 758-764 | RMDTIQE  | Overlap         | ELM_MOD | CK2 phosphorylation site                                                                                                                                                                                                                        |
|                  |   | 798-804 | HPVTRSE  | Embedded        |         |                                                                                                                                                                                                                                                 |
|                  |   | 440-443 | VSGD     | Overlap         | ELM_MOD | Glycosaminoglycan attachment site                                                                                                                                                                                                               |
|                  |   | 746-749 | PSAP     | Embedded        |         |                                                                                                                                                                                                                                                 |
|                  |   | 784-791 | NSSTAACS | Embedded        | ELM_MOD | GSK3 phosphorylation recognition site                                                                                                                                                                                                           |
|                  |   | 756-762 | HQRMDTI  | Overlap         | ELM_MOD | The LATS phosphorylation motif is recognised by the LATS kinases for Ser/Thr phosphorylation. Substrates are often found toward the end of the Hippo signalling pathway.                                                                        |
|                  |   | 783-788 | PNSSTA   | Embedded        | ELM_MOD | Generic motif for N-glycosylation. It was shown that Trp, Asp, and Glu are uncommon before the Ser/Thr position. Efficient glycosylation usually occurs when ~60 residues or more separate the glycosylation acceptor site from the C-terminus. |
|                  |   | 221-226 | MKNTCK   | Overlap         | ELM_MOD | NEK2 phosphorylation motif with preferred Phe, Leu or Met in the -3 position to compensate for less favorable residues in the +1 and +2 position.                                                                                               |
| <b>Clusterin</b> | 0 |         |          |                 |         |                                                                                                                                                                                                                                                 |

|              |                |         |          |                 |                                   |                                                                                                                                                   |
|--------------|----------------|---------|----------|-----------------|-----------------------------------|---------------------------------------------------------------------------------------------------------------------------------------------------|
| <b>PSEN2</b> | 1-25<br>(25)   | 6_10    | ASDSE    | Embedded        | ELM_DOC                           | The USP7 MATH domain binding motif variant based on the MDM2 and p53 interactions.                                                                |
|              |                | 22-27   | SAESPT   | Overlap         | ELM_DOC                           | The Class IV WW domain interaction motif is recognised primarily by the Pin1 phosphorylation-dependent prolyl isomerase.                          |
|              |                | 24-29   | ESPTPR   | Overlap         |                                   |                                                                                                                                                   |
|              |                | 17-21   | RTSLM    | Embedded        | ELM_LIG                           | Canonical Arg-containing phospho-motif mediating a strong interaction with 14-3-3 proteins.                                                       |
|              |                | 24-29   | ESPTPR   | Overlap         | ELM_MOD                           | Short version of the CDK phosphorylation site which shows specificity towards a lysine/arginine residue at the [ST] +2 position.                  |
|              |                | 22-29   | SAESPTPR | Overlap         | ELM_MOD                           | Longer version of the CDK phosphorylation site which shows specificity towards a lysine/arginine residue at position +4 after the phospho-Ser/Thr |
|              |                | 19-25   | SLMSAES  | Embedded        | ELM_MOD                           | CK1 phosphorylation site                                                                                                                          |
|              |                | 22-28   | SAESPTP  | Overlap         |                                   |                                                                                                                                                   |
|              |                | 4-10    | FMSDSE   | Embedded        | ELM_MOD                           | CK2 phosphorylation site                                                                                                                          |
|              |                | 6_12    | ASDSEEE  | Embedded        |                                   |                                                                                                                                                   |
|              |                | 27-33   | TPRSCQE  | Close proximity |                                   |                                                                                                                                                   |
|              |                | 15-22   | DERTSLMS | Embedded        | ELM_MOD                           | GSK3 phosphorylation recognition site                                                                                                             |
|              |                | 16-22   | ERTSLMS  | Embedded        | ELM_MOD                           | Secondary preference for PKA-type AGC kinase phosphorylation.                                                                                     |
|              |                | 15-21   | DERTSLM  | Embedded        | ELM_MOD                           | Ser/Thr residue phosphorylated by the Plk1 kinase                                                                                                 |
|              |                | 16-22   | ERTSLMS  | Embedded        | ELM_MOD                           | Ser/Thr residue phosphorylated by Plk4                                                                                                            |
|              |                | 22-28   | SAESPTP  | Overlap         | ELM_MOD                           | Proline-Directed Kinase (e.g. MAPK) phosphorylation site in higher eukaryotes                                                                     |
|              | 24-30          | ESPTPRS | Overlap  |                 |                                   |                                                                                                                                                   |
|              | 21-24          | MSAE    | Embedded | ELM_MOD         | Glycosaminoglycan attachment site |                                                                                                                                                   |
| <b>PLG</b>   | 463-470<br>(8) | 472-477 | DVETPS   | Close proximity | ELM_DOC                           | The Class IV WW domain interaction motif is recognised primarily by the Pin1 phosphorylation-dependent prolyl isomerase                           |

|              |              |         |         |                 |         |                                                                                                                                                                                   |
|--------------|--------------|---------|---------|-----------------|---------|-----------------------------------------------------------------------------------------------------------------------------------------------------------------------------------|
|              |              | 466-470 | PVVLL   | Embedded        | ELM_LIG | LIGand to interface formed by dimerisation of two chromoshadow domains in HP1 proteins.                                                                                           |
|              |              | 458-464 | EASVVAP | Overlap         | ELM_LIG | This is the motif recognized by those SH3 domains with a non-canonical class I recognition specificity                                                                            |
|              |              | 459-465 | ASVVAPP | Overlap         |         |                                                                                                                                                                                   |
|              |              | 465-471 | PPVVLLP | Overlap         |         |                                                                                                                                                                                   |
|              |              | 470-476 | LPDVETP | Overlap         |         |                                                                                                                                                                                   |
|              |              | 466-472 | PVVLLPD | Overlap         | ELM_LIG | Motif for the parallel beta augmentation mode of non-covalent binding to SUMO protein.                                                                                            |
|              |              | 472-478 | DVETPSE | Close proximity | ELM_MOD | CK2 phosphorylation site                                                                                                                                                          |
|              |              | 457-463 | TEASVVA | Overlap         | ELM_MOD | Ser/Thr residue phosphorylated by the Plk1 kinase                                                                                                                                 |
|              |              | 457-463 | TEASVVA | Overlap         | ELM_MOD | Ser/Thr residue phosphorylated by Plk4                                                                                                                                            |
|              |              | 472-478 | DVETPSE | Close proximity | ELM_MOD | Proline-Directed Kinase (e.g. MAPK) phosphorylation site in higher eukaryotes.                                                                                                    |
| <b>ADAM9</b> | 767-781 (15) | 759-765 | PVTPPRE | Close proximity | ELM_DEG | The TPxxE phospho-dependent degron binds the FBW7 F box proteins of the SCF (Skp1_Cullin-Fbox) complex.                                                                           |
|              | 799-819 (21) | 760-765 | VTPPRE  | Close proximity |         |                                                                                                                                                                                   |
|              |              | 772-776 | RFAVP   | Embedded        | ELM_DOC | SPAK/OSR1 kinase binding motif acts as a docking site which aids the interaction with their binding partners including the upstream activators and the phosphorylated substrates. |
|              |              | 795-799 | PKVSS   | Overlap         | ELM_DOC | The USP7 MATH domain binding motif variant based on the MDM2 and p53 interactions.                                                                                                |
|              |              | 815-819 | YSSLT   | Embedded        | ELM_LIG | CRK family SH2 domain binding motif.                                                                                                                                              |
|              |              | 769-772 | YANR    | Embedded        | ELM_LIG | GRB2-like Src Homology 2 (SH2) domains binding motif                                                                                                                              |
|              |              | 807-813 | RPAPAPP | Embedded        | ELM_LIG | This is the motif recognized by class I SH3 domains                                                                                                                               |
|              |              | 802-808 | NLIPARP | Embedded        | ELM_LIG | This is the motif recognized by those SH3 domains with a non-canonical class I recognition specificity                                                                            |
|              |              | 807-813 | RPAPAPP | Embedded        |         |                                                                                                                                                                                   |



|               |                  |                  |           |                 |         |                                                                                                                                                                                                                                              |
|---------------|------------------|------------------|-----------|-----------------|---------|----------------------------------------------------------------------------------------------------------------------------------------------------------------------------------------------------------------------------------------------|
|               |                  | 812-815          | PPLY      | Embedded        | ELM_LIG | PPXY is the motif recognized by WW domains of Group I                                                                                                                                                                                        |
|               |                  | 814-819          | LYSSLT    | Embedded        | ELM_MOD | NEK2 phosphorylation motif with preferred Phe, Leu or Met in the -3 position to compensate for less favorable residues in the +1 and +2 position.                                                                                            |
|               |                  | 796-802          | KVSSQGN   | Overlap         | ELM_MOD | (ST)Q motif which is phosphorylated by PIKK family members.                                                                                                                                                                                  |
|               |                  | 815-818          | YSSL      | Embedded        | ELM_TRG | Tyrosine-based sorting signal responsible for the interaction with mu subunit of AP (Adaptor Protein) complex                                                                                                                                |
| <b>ADAM10</b> | 313-318<br>(6)   | 737-741          | PRESY     | Overlap         | ELM_DOC | The USP7 MATH domain binding motif variant based on the MDM2 and p53 interactions.                                                                                                                                                           |
|               | 415-420<br>(6)   | 737-743          | PRESYQM   | Overlap         | ELM_MOD | Secondary preference for PKA-type AGC kinase phosphorylation.                                                                                                                                                                                |
|               | 741-748<br>(8)   | 746-748          | MRR       | Embedded        | ELM_TRG | The di-Arg ER retention motif is defined by two consecutive arginine residues (RR) or with a single residue insertion (RXR). The motif is completed by an adjacent hydrophobic/arginine residue which may be on either side of the Arg pair. |
| <b>ABCA7</b>  | 124-131<br>(8)   | 1353-1355        | RRL       | Embedded        | ELM_CLV | N-Arg dibasic convertase (NRD/Nardilysin) cleavage site (X- -R-K or R- -R-X).                                                                                                                                                                |
|               | 156-164<br>(9)   | 2130-2132        | KRV       | Close proximity | ELM_CLV | NEC1/NEC2 cleavage site (K-R- -X).                                                                                                                                                                                                           |
|               | 195-201<br>(7)   | 1349-1355        | RPGARRL   | Overlap         | ELM_CLV | Proprotein convertase 7 (PC7, PCSK7) cleavage site (R-X-X-X-[RK]-R- -X).                                                                                                                                                                     |
|               | 1142-1147<br>(6) | 1353-1357        | KNLTA     | Embedded        | ELM_CLV | Subtilisin/kexin isozyme-1 (SKII) cleavage site ([RK]-X-[hydrophobic]-[LTKF]- -X).                                                                                                                                                           |
|               | 1166-1173<br>(8) | 2064-2068        | RCALA     | Overlap         |         |                                                                                                                                                                                                                                              |
|               |                  | 1327-1333<br>(7) | 2063-2071 | GRCALARVF       | Overlap | ELM_DEG                                                                                                                                                                                                                                      |

|  |                |           |                   |                 |         |                                                                                                                                                                                                                                     |
|--|----------------|-----------|-------------------|-----------------|---------|-------------------------------------------------------------------------------------------------------------------------------------------------------------------------------------------------------------------------------------|
|  | 1352-1360 (9)  | 1349-1358 | GARRLLPD          | Overlap         | ELM_DOC | This motif is mainly based on cyclin A binding peptides and may not apply to all cyclins.                                                                                                                                           |
|  | 1386-1397 (12) | 1351-1358 | GARRLLPD          | Overlap         |         |                                                                                                                                                                                                                                     |
|  | 2067-2072 (6)  | 165-173   | RTESLGLAL         | Close proximity | ELM_DOC | A kinase docking motif that mediates interaction towards the ERK1/2 and p38 subfamilies of MAP kinases.                                                                                                                             |
|  | 2092-2102 (11) | 197-203   | LRSLEVEL          | Overlap         | ELM_DOC | Docking site required for the regulatory subunit B56 of PP2A for protein dephosphorylation.                                                                                                                                         |
|  | 2133-2146 (14) | 1144-1150 | LKVVEEC           | Overlap         |         |                                                                                                                                                                                                                                     |
|  |                | 196-200   | ALRSL             | Embedded        | ELM_DOC | The USP7 MATH domain binding motif variant based on the MDM2 and p53 interactions.                                                                                                                                                  |
|  |                | 1334-1339 | GNWTPE            | Close proximity | ELM_DOC | The Class IV WW domain interaction motif is recognised primarily by the Pin1 phosphorylation-dependent prolyl isomerase.                                                                                                            |
|  |                | 133-143   | RAARSTAQPQP       | Close proximity | ELM_LIG | Canonical Arg-containing phospho-motif mediating a strong interaction with 14-3-3 proteins.                                                                                                                                         |
|  |                | 1385-1392 | RNLSDFLV          | Overlap         |         |                                                                                                                                                                                                                                     |
|  |                | 2131-2139 | RVSQFLDDP         | Overlap         |         |                                                                                                                                                                                                                                     |
|  |                | 118-135   | AHRTLGLGKLIATLRAA | Overlap         | ELM_LIG | The WH2 motif is of variable length (16-19 amino acids) binding to the hydrophobic cleft formed by actin's subdomains 1 and 3. At the N-terminus it forms an alpha-helix followed by a flexible loop stabilised upon actin binding. |
|  |                | 159-165   | LLTSLLR           | Overlap         | ELM_LIG | Phosphothreonine motif binding a subset of FHA domains that show a preference for a large aliphatic amino acid at the pT+3 position.                                                                                                |
|  |                | 164-170   | LRTESLG           | Overlap         |         |                                                                                                                                                                                                                                     |
|  |                | 1173-1179 | DVTLRLK           | Overlap         |         |                                                                                                                                                                                                                                     |
|  |                | 2089-2095 | SQTMLEE           | Overlap         | ELM_LIG | Phosphothreonine motif binding a subset of FHA domains that have a preference for an acidic amino acid at the pT+3 position.                                                                                                        |

|  |           |           |                 |         |                                                                                                                                                                                                                                           |
|--|-----------|-----------|-----------------|---------|-------------------------------------------------------------------------------------------------------------------------------------------------------------------------------------------------------------------------------------------|
|  | 156-164   | VAELLTSLL | Embedded        | ELM_LIG | Amphipatic alpha helix that binds the GTPase-binding domain (GBD) in WASP and N-WASP.                                                                                                                                                     |
|  | 1140-1146 | EEIFLKV   | Overlap         | ELM_LIG | Canonical LIR motif that binds to Atg8 protein family members to mediate processes involved in autophagy                                                                                                                                  |
|  | 1141-1146 | EIFLKV    | Overlap         |         |                                                                                                                                                                                                                                           |
|  | 1394-1398 | TYPRL     | Overlap         |         |                                                                                                                                                                                                                                           |
|  | 159-165   | LLTSLLR   | Overlap         | ELM_LIG | The nuclear receptor box motif (LXXLL) confers binding to nuclear receptors                                                                                                                                                               |
|  | 202-208   | ELRALLQ   | Close proximity |         |                                                                                                                                                                                                                                           |
|  | 2141-2146 | TAETVL    | Embedded        | ELM_LIG | The C-terminal class 1 PDZ-binding motif is classically represented by a pattern like (ST)X(VIL)*                                                                                                                                         |
|  | 2099-2102 | YFSK      | Embedded        | ELM_LIG | STAT5 Src Homology 2 (SH2) domain binding motif.                                                                                                                                                                                          |
|  | 1354-1360 | RLLPDCP   | Embedded        | ELM_LIG | This is the motif recognized by class I SH3 domains                                                                                                                                                                                       |
|  | 1335-1341 | NWTPESP   | Close proximity | ELM_LIG | This is the motif recognized by those SH3 domains with a non-canonical class I recognition specificity                                                                                                                                    |
|  | 1354-1360 | RLLPDCP   | Embedded        |         |                                                                                                                                                                                                                                           |
|  | 152-158   | PMLDVAE   | Overlap         | ELM_LIG | Motif for the parallel beta augmentation mode of non-covalent binding to SUMO protein.                                                                                                                                                    |
|  | 193-199   | ELLALRS   | Overlap         |         |                                                                                                                                                                                                                                           |
|  | 1138-1141 | SLEE      | Close proximity | ELM_LIG | Major TRAF2-binding consensus motif. Members of the tumor necrosis factor receptor (TNFR) superfamily initiate intracellular signaling by recruiting the C-domain of the TNFR-associated factors (TRAFs) through their cytoplasmic tails. |
|  | 150-156   | EPPMLDV   | Overlap         | ELM_LIG | This WDR5-binding motif binds to a cleft between blades 5 and 6 of the WD40 repeat domain of WDR5, opposite of the Win motif-binding site, to mediate assembly of histone modification complexes.                                         |
|  | 1135-1141 | SDTSLEE   | Close proximity | ELM_MOD | CK1 phosphorylation site                                                                                                                                                                                                                  |

|  |           |          |                 |         |                                                                                                                                                                                                                                                 |
|--|-----------|----------|-----------------|---------|-------------------------------------------------------------------------------------------------------------------------------------------------------------------------------------------------------------------------------------------------|
|  | 196-202   | ALRSLVE  | Overlap         | ELM_MOD | CK2 phosphorylation site                                                                                                                                                                                                                        |
|  | 1134-1140 | ISDTSLE  | Close proximity |         |                                                                                                                                                                                                                                                 |
|  | 1135-1141 | SDTSLEE  | Close proximity |         |                                                                                                                                                                                                                                                 |
|  | 2088-2094 | VSQTMLE  | Overlap         |         |                                                                                                                                                                                                                                                 |
|  | 1332-1335 | ASGN     | Overlap         |         |                                                                                                                                                                                                                                                 |
|  | 159-166   | LLTSLIRT | Overlap         | ELM_MOD | GSK3 phosphorylation recognition site                                                                                                                                                                                                           |
|  | 1330-1337 | VLASGNWT | Overlap         |         |                                                                                                                                                                                                                                                 |
|  | 2084-2091 | EDFSVSQT | Close proximity |         |                                                                                                                                                                                                                                                 |
|  | 2137-2144 | DDPSTAET | Embedded        |         |                                                                                                                                                                                                                                                 |
|  | 2128-2134 | HPKRVSQ  | Overlap         | ELM_MOD | The LATS phosphorylation motif is recognised by the LATS kinases for Ser/Thr phosphorylation. Substrates are often found toward the end of the Hippo signalling pathway.                                                                        |
|  | 1334-1339 | GNWTPE   | Close proximity | ELM_MOD | Generic motif for N-glycosylation. It was shown that Trp, Asp, and Glu are uncommon before the Ser/Thr position. Efficient glycosylation usually occurs when ~60 residues or more separate the glycosylation acceptor site from the C-terminus. |
|  | 1380-1385 | QNLTR    | Close proximity |         |                                                                                                                                                                                                                                                 |
|  | 1385-1390 | RNLSDF   | Overlap         |         |                                                                                                                                                                                                                                                 |
|  | 128-133   | LIATLR   | Overlap         | ELM_MOD | NEK2 phosphorylation motif with preferred Phe, Leu or Met in the -3 position to compensate for less favorable residues in the +1 and +2 position.                                                                                               |
|  | 159-164   | LLTSL    | Embedded        |         |                                                                                                                                                                                                                                                 |
|  | 1172-1177 | LDVTLR   | Embedded        |         |                                                                                                                                                                                                                                                 |
|  | 1391-1396 | LVKTYP   | Embedded        |         |                                                                                                                                                                                                                                                 |
|  | 2086-2091 | FSVSQT   | Close proximity |         |                                                                                                                                                                                                                                                 |
|  | 2086-2092 | FSVSQTM  | Overlap         | ELM_MOD | (ST)Q motif which is phosphorylated by PIKK family members.                                                                                                                                                                                     |
|  | 2130-2136 | KRVSQFL  | Overlap         | ELM_MOD | Main preference for PKA-type AGC kinase phosphorylation.                                                                                                                                                                                        |
|  | 2130-2136 | KRVSQFL  | Overlap         | ELM_MOD | Secondary preference for PKA-type AGC kinase phosphorylation.                                                                                                                                                                                   |



|             |               |           |          |                 |         |                                                                                                                                                                                                                                                                  |
|-------------|---------------|-----------|----------|-----------------|---------|------------------------------------------------------------------------------------------------------------------------------------------------------------------------------------------------------------------------------------------------------------------|
|             |               | 1135-1141 | SDTSLEE  | Close proximity | ELM_MOD | Ser/Thr residue phosphorylated by the Plk1 kinase                                                                                                                                                                                                                |
|             |               | 1172-1178 | LDVTLRL  | Overlap         |         |                                                                                                                                                                                                                                                                  |
|             |               | 2084-2090 | EDFSVSQ  | Close proximity |         |                                                                                                                                                                                                                                                                  |
|             |               | 159-165   | LLTSLLR  | Overlap         | ELM_MOD | Ser/Thr residue phosphorylated by Plk4                                                                                                                                                                                                                           |
|             |               | 2088-2094 | VSQTMLE  | Overlap         |         |                                                                                                                                                                                                                                                                  |
|             |               | 1334-1340 | GNWTPES  | Close proximity | ELM_MOD | Proline-Directed Kinase (e.g. MAPK) phosphorylation site in higher eukaryotes.                                                                                                                                                                                   |
|             |               | 1395-1398 | YPRL     | Overlap         | ELM_TRG | Tyrosine-based sorting signal responsible for the interaction with mu subunit of AP (Adaptor Protein) complex                                                                                                                                                    |
|             |               | 1353-1355 | RRL      | Embedded        | ELM_TRG | The di-Arg ER retention motif is defined by two consecutive arginine residues (RR) or with a single residue insertion (RXR). The motif is completed by an adjacent hydrophobic/arginine residue which may be on either side of the Arg pair.                     |
|             |               | 155-160   | DVAELL   | Overlap         | ELM_TRG | Sorting and internalisation signal found in the cytoplasmic juxta-membrane region of type I transmembrane proteins. Targets them from the Trans Golgi Network to the lysosomal-endosomal-melanosomal compartments. Interacts with adaptor protein (AP) complexes |
| <b>LRP1</b> | 3965-3970 (6) | 4501-4507 | NFTNPVY  | Overlap         | ELM_LIG | Phosphothreonine motif binding a subset of FHA domains that show a preference for a large aliphatic amino acid at the pT+3 position.                                                                                                                             |
|             | 4505-4513 (9) | 4501-4508 | NFTNPVYA | Overlap         | ELM_LIG | These phosphorylation-independent motifs bind to Dab-like PTB domains. Binding is not driven by contacts at the 0 or FY position, but instead is dependent upon the large number of hydrophobic and hydrogen bond                                                |

|              |             |           |                   |          |         |                                                                                                                                                                                                                                                 |
|--------------|-------------|-----------|-------------------|----------|---------|-------------------------------------------------------------------------------------------------------------------------------------------------------------------------------------------------------------------------------------------------|
|              |             |           |                   |          |         | contacts between motif and domain.                                                                                                                                                                                                              |
|              |             | 4501-4507 | NFTNPVY           | Overlap  | ELM_LIG | This phosphorylation-dependent motif binds to Shc-like and IRS-like PTB domains. The pTyr is positioned within a highly basic-charged anchoring pocket. A hydrophobic residue -5 (compared to pY) increases the affinity of the interaction.    |
|              |             | 4507-4511 | YATLY             | Embedded | ELM_LIG | CRK family SH2 domain binding motif.                                                                                                                                                                                                            |
|              |             | 4500-4505 | TNFTNP            | Overlap  | ELM_MOD | Generic motif for N-glycosylation. It was shown that Trp, Asp, and Glu are uncommon before the Ser/Thr position. Efficient glycosylation usually occurs when ~60 residues or more separate the glycosylation acceptor site from the C-terminus. |
|              |             | 4506-4512 | VYATLYM           | Embedded | ELM_MOD | Ser/Thr residue phosphorylated by Plk4                                                                                                                                                                                                          |
|              |             | 4507-4510 | YATL              | Embedded | ELM_TRG | Tyrosine-based sorting signal responsible for the interaction with mu subunit of AP (Adaptor Protein) complex                                                                                                                                   |
| <b>TREM2</b> | 0           |           |                   |          |         |                                                                                                                                                                                                                                                 |
| <b>ECE2</b>  | 1-22 (22)   | 18-20     | KRA               | Embedded | ELM_CLV | NEC1/NEC2 cleavage site (K-R- -X).                                                                                                                                                                                                              |
|              | 718-724 (7) | 18-22     | KRATL             | Embedded | ELM_CLV | Subtilisin/kexin isozyme-1 (SKI1) cleavage site ([RK]-X-[hydrophobic]-[LTKF]- -X).                                                                                                                                                              |
|              |             | 1_3       | MNV               | Embedded | ELM_DEG | N-terminal motif that initiates protein degradation by binding to the UBR-box of N-recognins. This N-degron variant comprises N-terminal Asn or Gln as destabilizing residue.                                                                   |
|              |             | 3_19      | VALQELGAGSNMVEYKR | Embedded | ELM_DOC | Reverse (C to N direction) of the classical MAPK docking motif ELM:DOC_MAPK_gen_1 with an often extended linker region of the bipartite motif.                                                                                                  |
|              |             | 19-23     | RATLR             | Overlap  | ELM_LIG | Canonical Arg-containing phospho-motif mediating a                                                                                                                                                                                              |

|                   |               |       |           |                 |         |                                                                                                                                                                                                                                           |
|-------------------|---------------|-------|-----------|-----------------|---------|-------------------------------------------------------------------------------------------------------------------------------------------------------------------------------------------------------------------------------------------|
|                   |               |       |           |                 |         | strong interaction with 14-3-3 proteins.                                                                                                                                                                                                  |
|                   | 19-25         |       | RATLRDE   | Overlap         | ELM_LIG | Phosphothreonine motif binding a subset of FHA domains that have a preference for an acidic amino acid at the pT+3 position.                                                                                                              |
|                   | 4_7           |       | ALQE      | Embedded        | ELM_LIG | Major TRAF2-binding consensus motif. Members of the tumor necrosis factor receptor (TNFR) superfamily initiate intracellular signaling by recruiting the C-domain of the TNFR-associated factors (TRAFs) through their cytoplasmic tails. |
|                   | 18-24         |       | KRATLRD   | Overlap         | ELM_MOD | Main preference for PKA-type AGC kinase phosphorylation                                                                                                                                                                                   |
|                   | 18-24         |       | KRATLRD   | Overlap         | ELM_MOD | Secondary preference for PKA-type AGC kinase phosphorylation.                                                                                                                                                                             |
|                   | 12-20         |       | SNMVEYKRA | Embedded        | ELM_MOD | Inverted version of SUMOylation motif recognized for modification by SUMO-1                                                                                                                                                               |
| <b>SORL1</b>      | 0             |       |           |                 |         |                                                                                                                                                                                                                                           |
| <b>A2M</b>        | 1148-1155(8)  | None  |           |                 |         |                                                                                                                                                                                                                                           |
|                   | 1209-1218(10) |       |           |                 |         |                                                                                                                                                                                                                                           |
| <b>BACE1</b>      | 0             |       |           |                 |         |                                                                                                                                                                                                                                           |
| <b>Neprilysin</b> | 0             |       |           |                 |         |                                                                                                                                                                                                                                           |
| <b>Nicastrin</b>  | 0             |       |           |                 |         |                                                                                                                                                                                                                                           |
| <b>PEN2</b>       | 0             |       |           |                 |         |                                                                                                                                                                                                                                           |
| <b>IDE</b>        | 70-77(8)      | 74-78 | KVLLI     | Embedded        | ELM_CLV | Subtilisin/kexin isozyme-1 (SKI1) cleavage site ([RK]-X-[hydrophobic]-[LTKF]-[-X]).                                                                                                                                                       |
|                   | 108-115(8)    | 61-69 | KREYRGLEL | Close proximity | ELM_DOC | MAPK interacting molecules (e.g. MAPKKs, substrates, phosphatases) carry docking motif that help to regulate specific interaction in the MAPK cascade. The classic motif approximates (R/K)xxxx#x# where # is a hydrophobic residue.      |

|              |                 |         |               |                 |         |                                                                                                                                                         |
|--------------|-----------------|---------|---------------|-----------------|---------|---------------------------------------------------------------------------------------------------------------------------------------------------------|
|              |                 | 69-77   | LANGIKVLL     | Overlap         | ELM_LIG | Amphipatic alpha helix that binds the GTPase-binding domain (GBD) in WASP and N-WASP.                                                                   |
|              |                 | 74-79   | KVLLIS        | Overlap         | ELM_LIG | A binding site for IRF-3 protein present in various innate adaptor proteins and the viral protein NSP1 to trigger the innate immune responsive pathways |
|              |                 | 74-80   | KVLLISD       | Overlap         | ELM_LIG | Motif for the parallel beta augmentation mode of non-covalent binding to SUMO protein.                                                                  |
|              |                 | 113-120 | MLFLGTKK      | Overlap         | ELM_LIG | UBA3 adenylation domain binding motif variant based on the UBE2M and UBE2F interactions.                                                                |
|              |                 | 79-85   | SDPTTDK       | Close proximity | ELM_MOD | CK1 phosphorylation site                                                                                                                                |
|              |                 | 76-83   | LLISDPTT      | Overlap         | ELM_MOD | GSK3 phosphorylation recognition site                                                                                                                   |
|              |                 | 79-86   | SDPTTDKS      | Close proximity |         |                                                                                                                                                         |
|              |                 | 115-120 | FLGTKK        | Overlap         | ELM_MOD | NEK2 phosphorylation motif with preferred Phe, Leu or Met in the -3 position to compensate for less favorable residues in the +1 and +2 position.       |
|              |                 | 68-80   | ELANGIKVLLISD | Overlap         | ELM_TRG | Some proteins re-exported from the nucleus contain a Leucine-rich nuclear export signal (NES) binding to the CRM1 exportin protein.                     |
| <b>PLAU</b>  | No result found |         |               |                 |         |                                                                                                                                                         |
| <b>PLAT</b>  | 0               |         |               |                 |         |                                                                                                                                                         |
| <b>APH1A</b> | 0               |         |               |                 |         |                                                                                                                                                         |
| <b>APH1B</b> | 0               |         |               |                 |         |                                                                                                                                                         |
